# Supplementary material
Source: bioRxiv or medRxiv preprint supplement (https://www.biorxiv.org/highwire/filestream/83945/field_highwire_adjunct_files/0/273110-1.pdf)
Supplement: Supplementary file [file 273110-1.pdf]

## 1 **Supplementary Section**

2           In the following section we present figures and tables portraying family-wise error-rates  
3 (FWER) and statistical powers estimated from the data synthetically generated with the set of  
4 parameters not reported in the main text. The section includes 13 figures and 5 tables.

5  
6 *Figures.* The FWER figures portray the mean FWER and 95% bootstrap confidence intervals  
7 (btCIs) computed across Monte-Carlo (MC) simulations for all trials numbers, subject groups  
8 (i.e.  $n=6$ ;  $n=10$ ;  $n=14$ ; and  $n=18$ ) and single subject scenario computed using synthetically  
9 generated data with noise sampled from uniform (Figure S1) and exponential (Figure S2)  
10 distributions.

11           The statistical power figures show the mean power and 95% btCIs across Monte-Carlo  
12 (MC) simulations for all trials numbers, subject groups (i.e.  $n=6$ ;  $n=10$ ;  $n=14$ ; and  $n=18$ ) and  
13 single subject scenario estimated from synthetic data with noise sampled from normal (Figures  
14 S3-S5), uniform (Figures S6-S9) and exponential (Figures S10-S13) distributions.

15           This section includes 3 figures for data with noise generated from a normal distribution.  
16 These show the results for the cases where multivariate effect was introduced over TRs 5 and 6  
17 (Figure S3); over TRs 5, 6, 7 and 8 (Figure S4); and over TRs 5, 6, 7, 8 and 9 (Figure S5). It  
18 further comprises 4 figures showing the results for the data generated with noise sampled from  
19 a uniform distribution. These 4 figures respectively portray data where the multivariate effect  
20 was introduced over TRs 5 and 6 (Figure S6); over TRs 5, 6 and 7 (Figure S7); over TRs 5, 6, 7  
21 and 8 (Figure S8); and over TRs 5, 6, 7, 8 and 9 (Figure S9). The final set of 4 figures depicts  
22 the statistical power estimated for data with noise sampled from an exponential distribution with  
23 multivariate effect introduced over TRs 5 and 6 (Figure S10); over TRs 5, 6 and 7 (Figure S11);  
24 over TRs 5, 6, 7 and 8 (Figure S12); and over TRs 5, 6, 7, 8 and 9 (Figure S13).

25

26 *Tables.* The 5 tables contain the mean and 95% btCIs of FWER and statistical power for all  
27 trials numbers, subject groups (i.e.  $n=6$ ;  $n=10$ ;  $n=14$ ; and  $n=18$ ) and single subject scenario, for  
28 the synthetic data generate with noise sampled from normal, uniform and exponential  
29 distributions. The 5 tables are structured as follows: in Table 1 we report all values for the  
30 FWER estimation. Tables 2-5 instead contain the statistical power respectively estimated for the  
31 scenario in which we introduced a multivariate pattern across TRs 5 and 6 (Table 2); TRs 5, 6  
32 and 7 (Table 3); TRs 5, 6, 7 and 8 (Table 4); and TRs 5, 6, 7, 8 and 9 (Table 5).

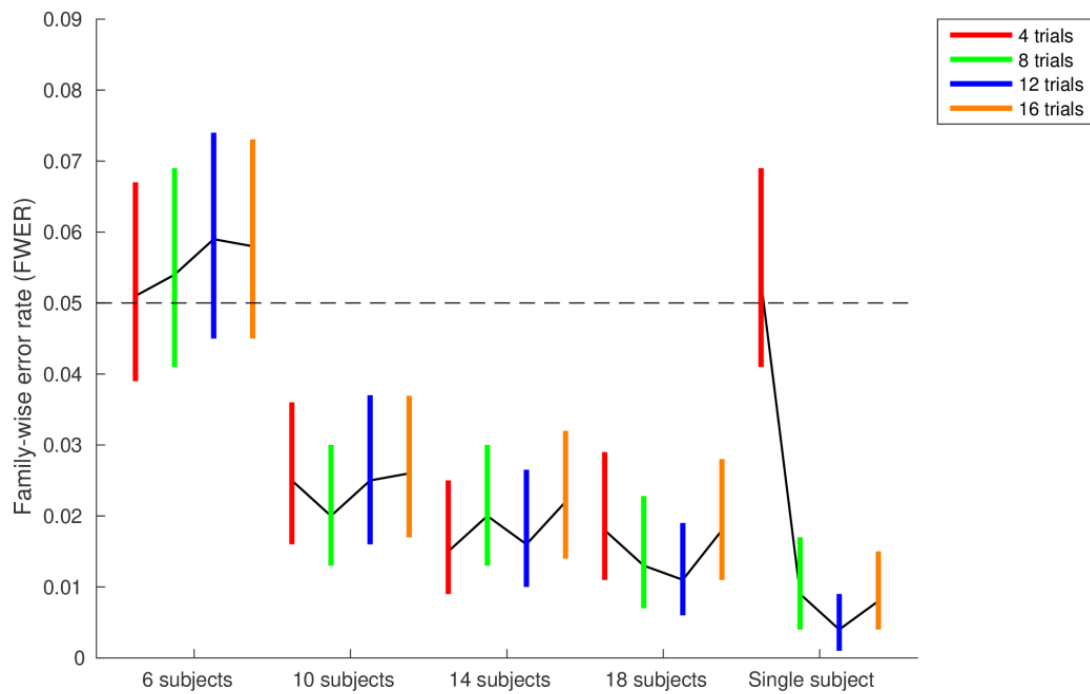

33

34 *Figure S1. Mean FWER for synthetic data generated with noise sampled from a **Uniform***  
35 *distribution. Error-bars represent 95% btCI across MC simulations.*

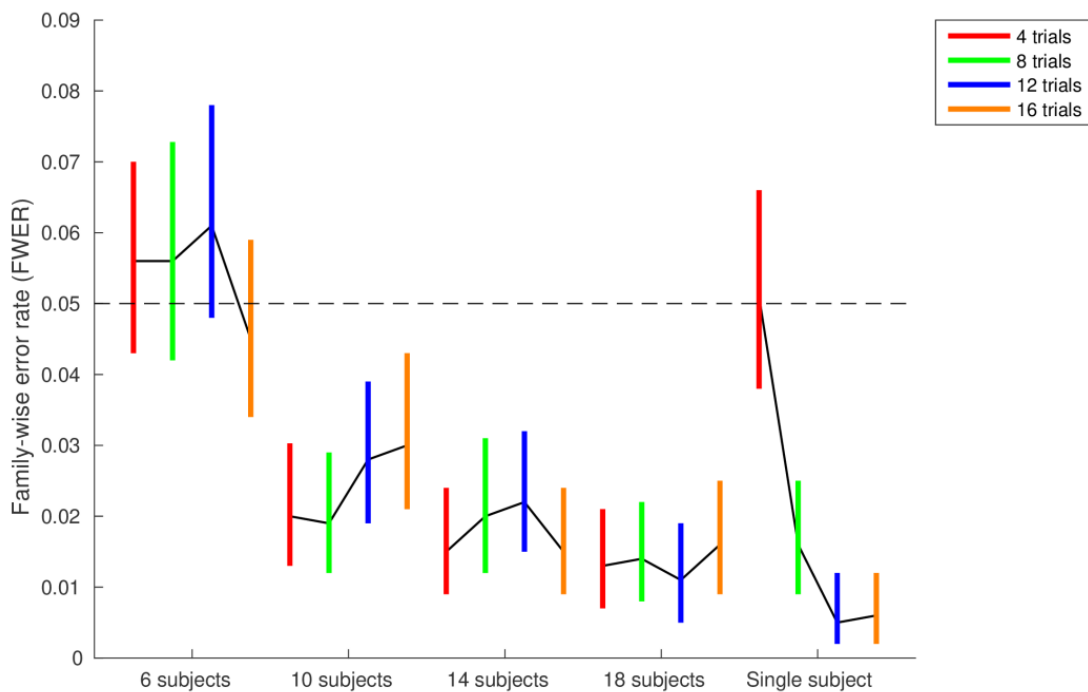

36

37 *Figure S2. Mean FWER for synthetic data generated with noise sampled from an **Exponential***38 *distribution. Error-bars represent 95% btCI across MC simulations.*

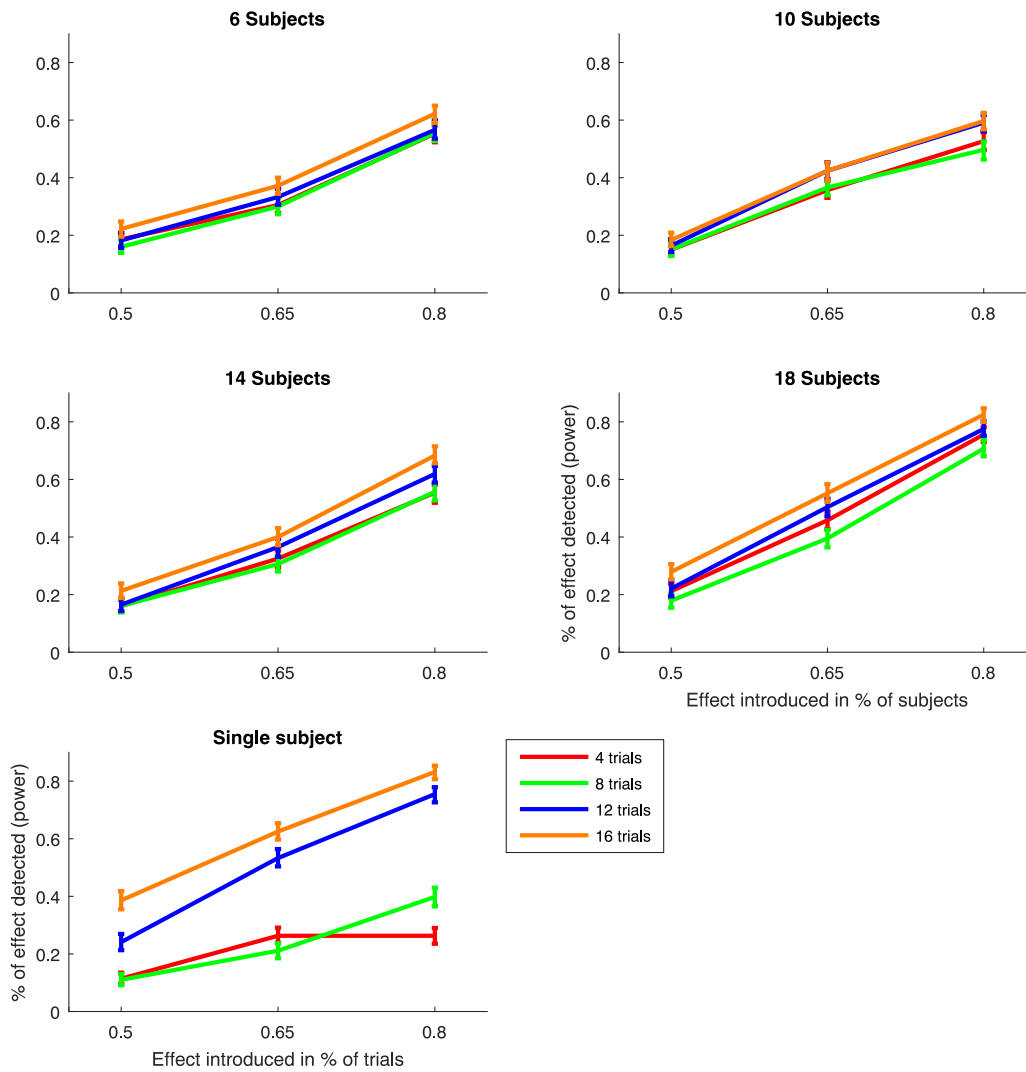

39  
 40 *Figure S3. Mean Power of both the group and the single subject analysis estimated using*  
 41 *synthetically generated data with noise sampled from a **Normal** distribution. Here we introduced*  
 42 *a multivariate effect over 2 time-points, specifically TRs 5 and 6. Error-bars represent 95% btCI*  
 43 *across MC simulations.*

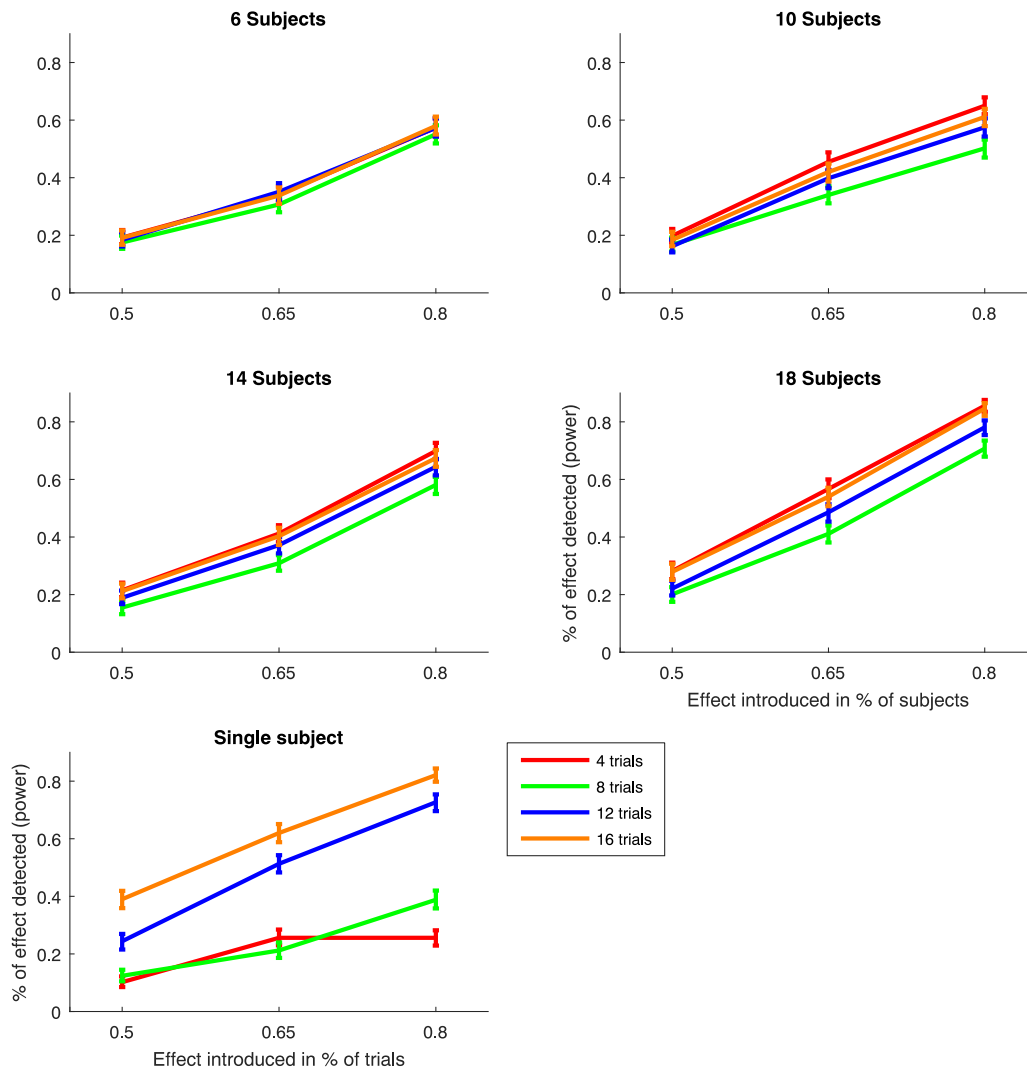

44  
 45 *Figure S4. Mean Power of both the group and the single subject analysis estimated using*  
 46 *synthetically generated data with noise sampled from a **Normal** distribution. Here we introduced*  
 47 *a multivariate effect over 4 time-points, specifically TRs 5, 6, 7 and 8. Error-bars represent 95%*  
 48 *btCI across MC simulations.*

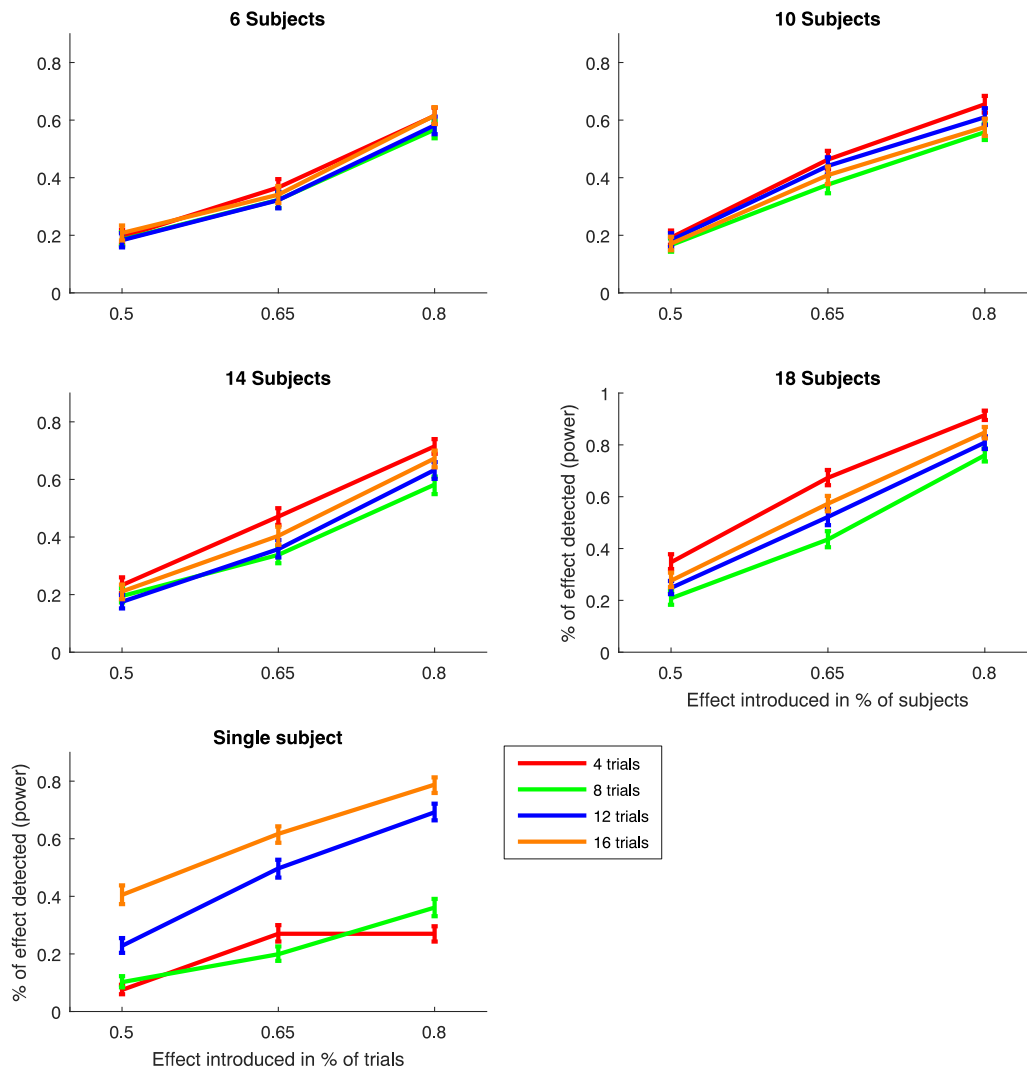

49  
 50 *Figure S5. Mean Power of both the group and the single subject analysis estimated using*  
 51 *synthetically generated data with noise sampled from a **Normal** distribution. Here we introduced*  
 52 *a multivariate effect over 5 time-points, specifically TRs 5, 6, 7, 8 and 9. Error-bars represent*  
 53 *95% btCI across MC simulations.*

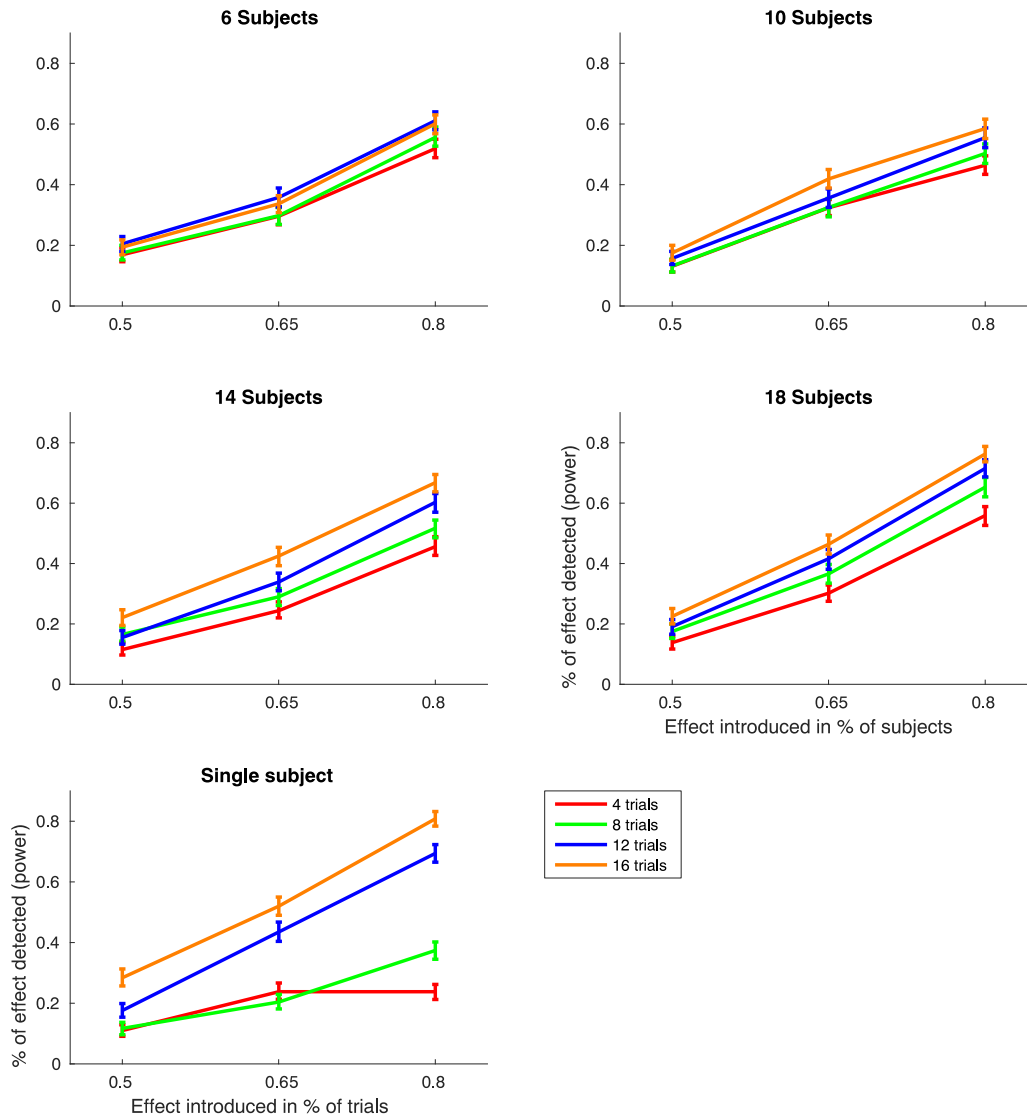

54  
 55 *Figure S6. Mean Power of both the group and the single subject analysis estimated using*  
 56 *synthetically generated data with noise sampled from a **Uniform** distribution. Here we*  
 57 *introduced a multivariate effect over 2 time-points, specifically TRs 5 and 6. Error-bars represent*  
 58 *95% btCI across MC simulations.*



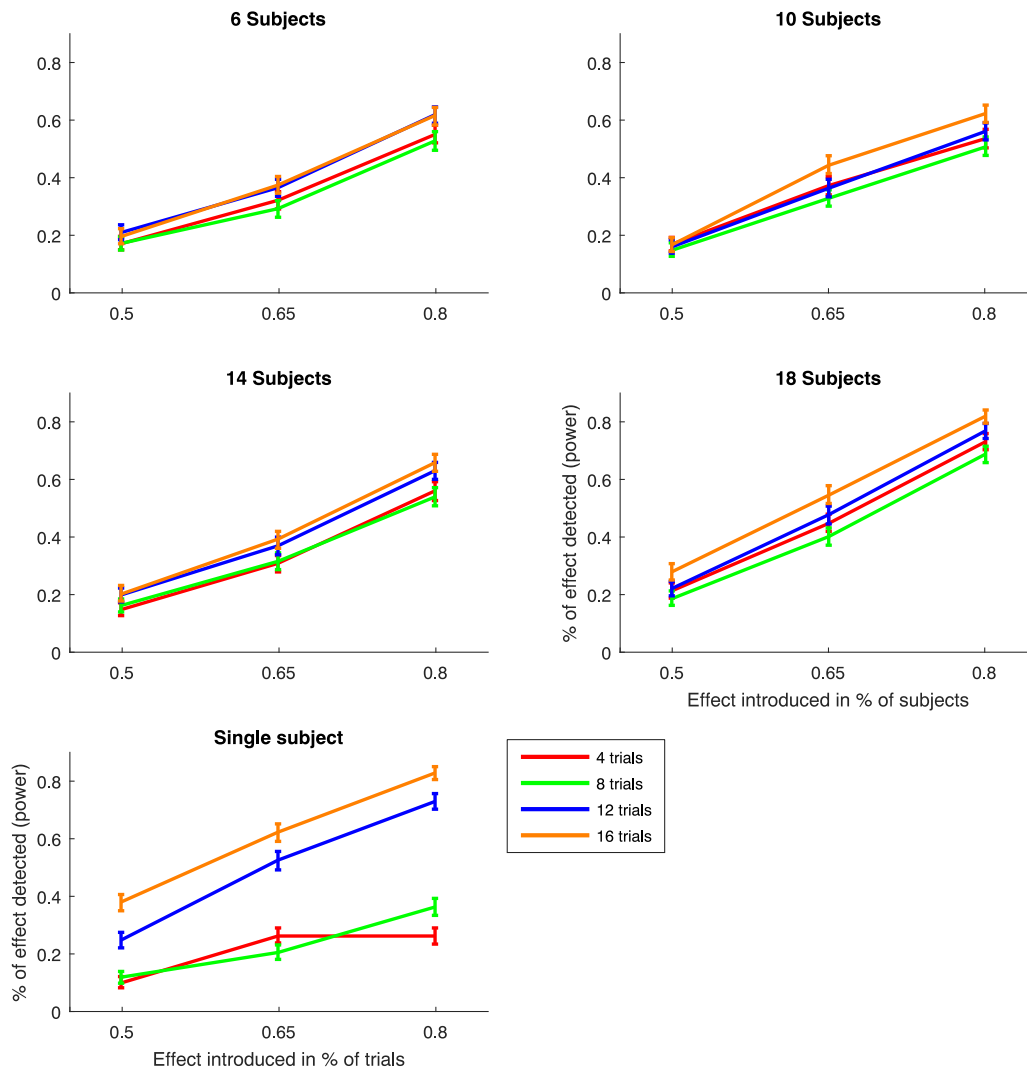

59  
 60 *Figure S7. Mean Power of both the group and the single subject analysis estimated using*  
 61 *synthetically generated data with noise sampled from a **Uniform** distribution. Here we*  
 62 *introduced a multivariate effect over 3 time-points, specifically TRs 5, 6 and 7. Error-bars*  
 63 *represent 95% btCI across MC simulations.*

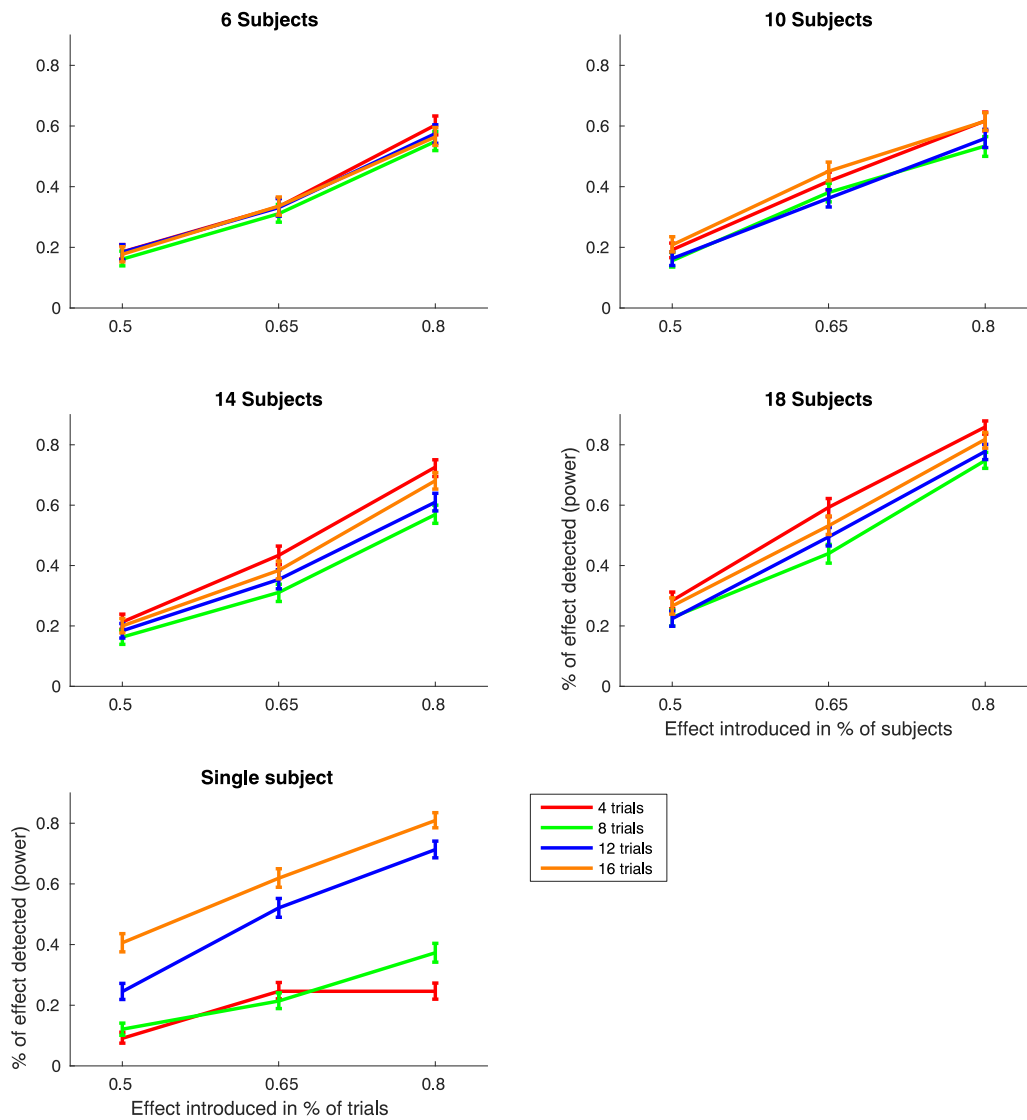

64  
 65 *Figure S8. Mean Power of both the group and the single subject analysis estimated using*  
 66 *synthetically generated data with noise sampled from a **Uniform** distribution. Here we*  
 67 *introduced a multivariate effect over 4 time-points, specifically TRs 5, 6, 7 and 8. Error-bars*  
 68 *represent 95% btCI across MC simulations.*

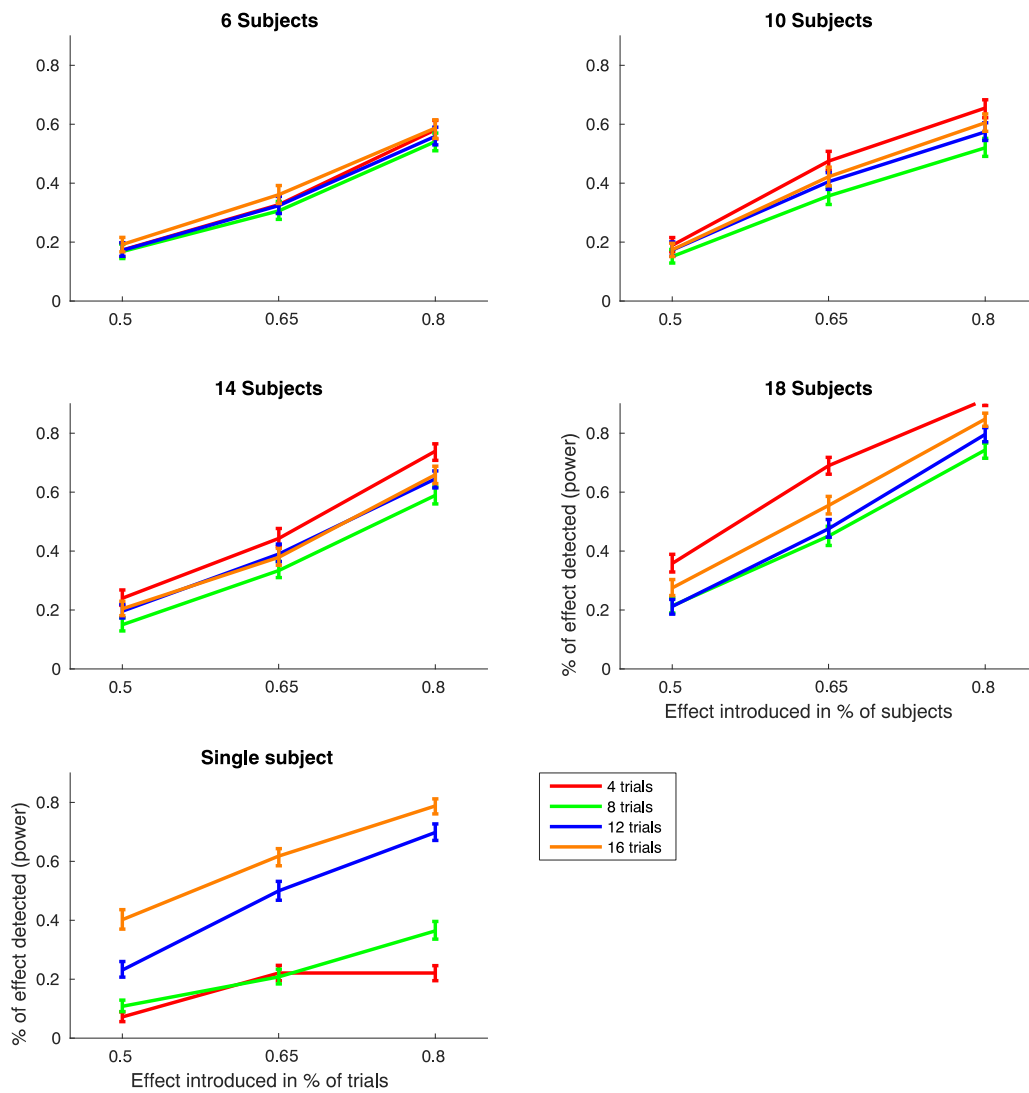

69  
 70 *Figure S9. Mean Power of both the group and the single subject analysis estimated using*  
 71 *synthetically generated data with noise sampled from a **Uniform** distribution. Here we*  
 72 *introduced a multivariate effect over 5 time-points, specifically TRs 5, 6, 7, 8 and 9. Error-bars*  
 73 *represent 95% btCI across MC simulations.*

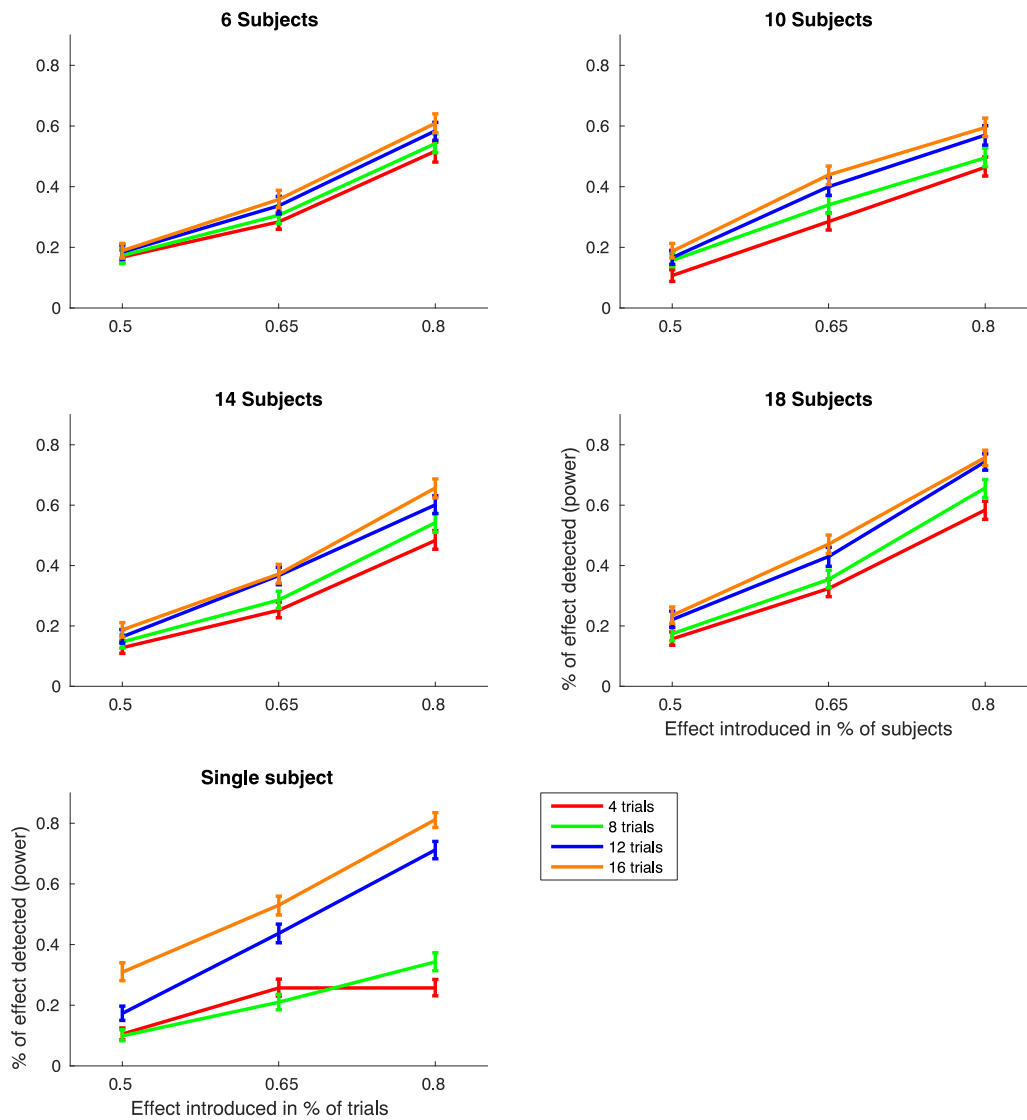

74  
 75 *Figure S10. Mean Power of both the group and the single subject analysis estimated using*  
 76 *synthetically generated data with noise sampled from a **Exponential** distribution. Here we*  
 77 *introduced a multivariate effect over 2 time-points, specifically TRs 5 and 6. Error-bars represent*  
 78 *95% btCI across MC simulations.*

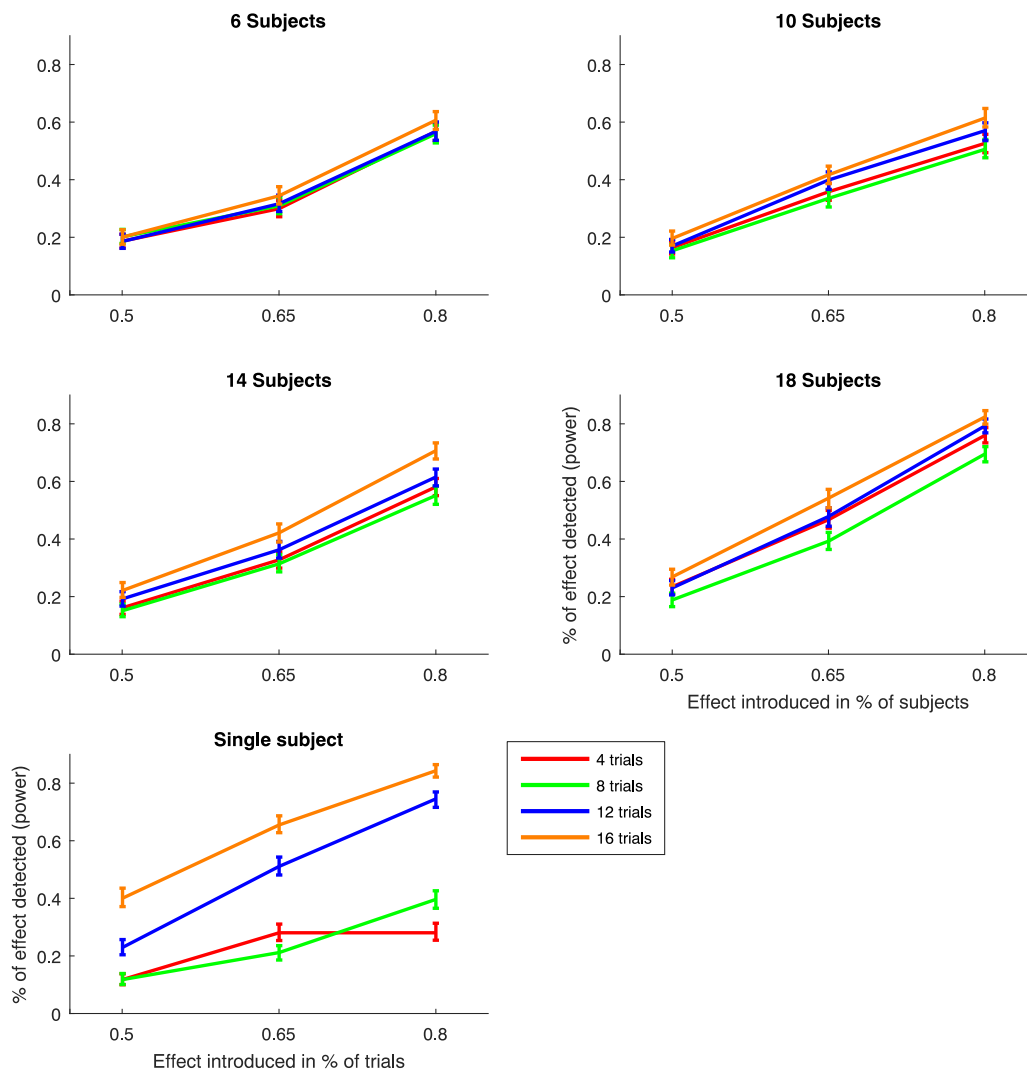

79  
 80 *Figure S11. Mean Power of both the group and the single subject analysis estimated using*  
 81 *synthetically generated data with noise sampled from a **Exponential** distribution. Here we*  
 82 *introduced a multivariate effect over 3 time-points, specifically TRs 5, 6 and 7. Error-bars*  
 83 *represent 95% btCI across MC simulations.*

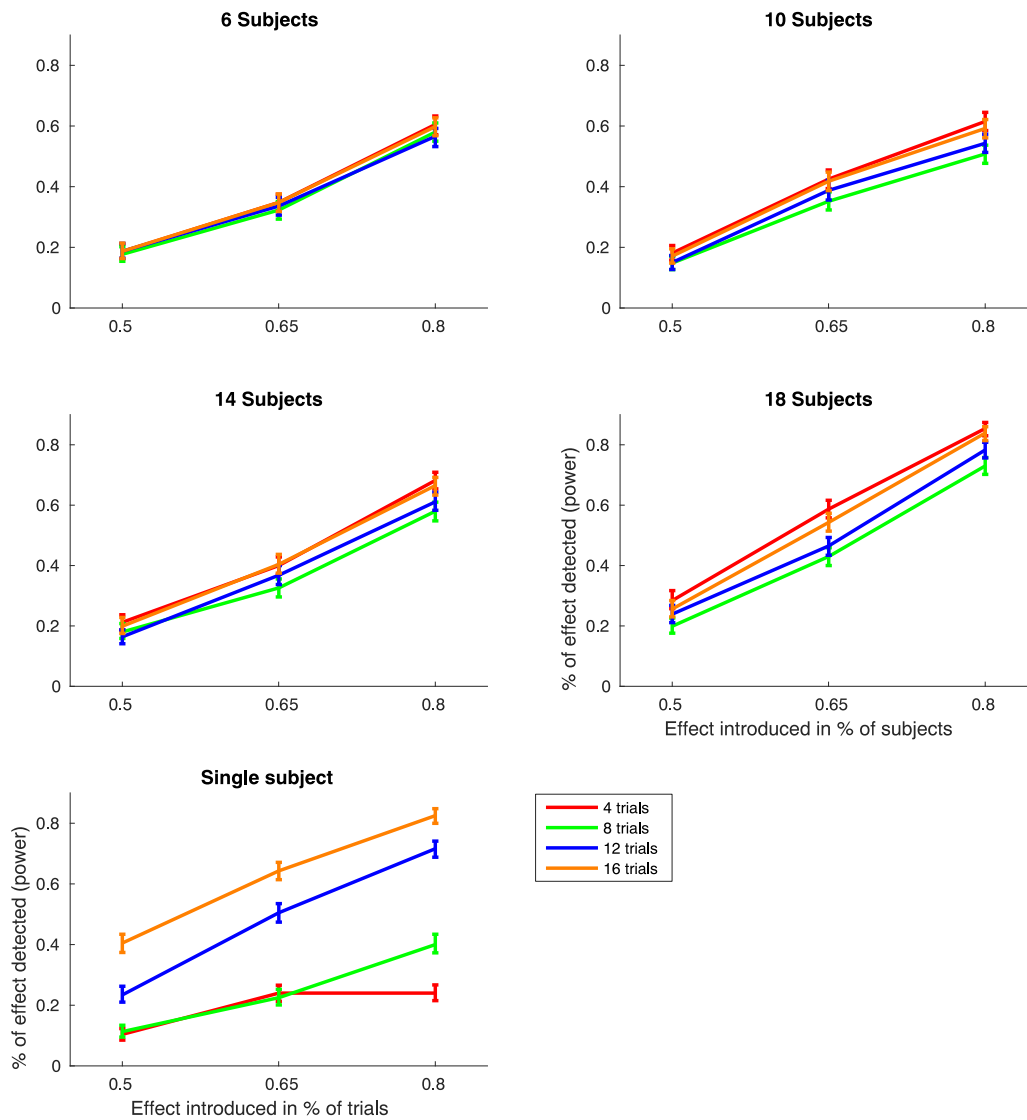

84  
 85 *Figure S12. Mean Power of both the group and the single subject analysis estimated using*  
 86 *synthetically generated data with noise sampled from a **Exponential** distribution. Here we*  
 87 *introduced a multivariate effect over 4 time-points, specifically TRs 5, 6, 7 and 8. Error-bars*  
 88 *represent 95% btCI across MC simulations.*

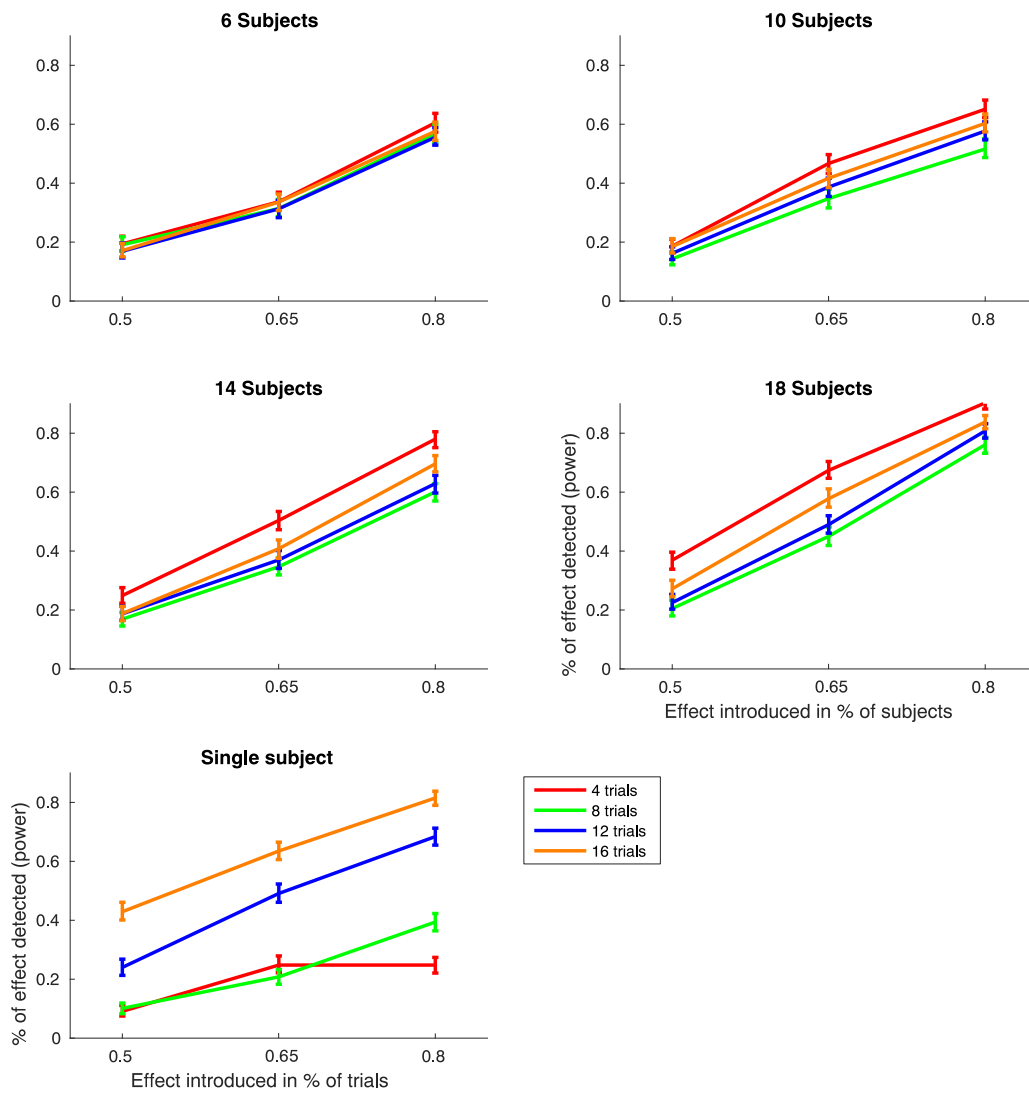

89  
 90 *Figure S13. Mean Power of both the group and the single subject analysis estimated using*  
 91 *synthetically generated data with noise sampled from a **Exponential** distribution. Here we*  
 92 *introduced a multivariate effect over 5 time-points, specifically TRs 5, 6, 7, 8 and 9. Error-bars*  
 93 *represent 95% btCI across MC simulations.*

| <b>FWER</b>  | <b>Lower CI</b> | <b>Upper CI</b> | <b>Number of Subjects</b> | <b>Number of Trials</b> | <b>Noise Distribution</b> |
|--------------|-----------------|-----------------|---------------------------|-------------------------|---------------------------|
| <b>0.058</b> | 0.045           | 0.074           | 6                         | 4                       | normal                    |
| <b>0.061</b> | 0.047           | 0.077           | 6                         | 8                       | normal                    |
| <b>0.056</b> | 0.042           | 0.070149        | 6                         | 12                      | normal                    |
| <b>0.056</b> | 0.043           | 0.071           | 6                         | 16                      | normal                    |
| <b>0.028</b> | 0.02            | 0.040828        | 10                        | 4                       | normal                    |
| <b>0.03</b>  | 0.02            | 0.042           | 10                        | 8                       | normal                    |
| <b>0.027</b> | 0.018           | 0.038           | 10                        | 12                      | normal                    |
| <b>0.025</b> | 0.016           | 0.03576         | 10                        | 16                      | normal                    |
| <b>0.021</b> | 0.012           | 0.03            | 14                        | 4                       | normal                    |
| <b>0.022</b> | 0.014           | 0.032           | 14                        | 8                       | normal                    |
| <b>0.023</b> | 0.015           | 0.034           | 14                        | 12                      | normal                    |
| <b>0.021</b> | 0.014           | 0.032           | 14                        | 16                      | normal                    |
| <b>0.018</b> | 0.011           | 0.028           | 18                        | 4                       | normal                    |
| <b>0.02</b>  | 0.013           | 0.03            | 18                        | 8                       | normal                    |
| <b>0.009</b> | 0.004           | 0.016           | 18                        | 12                      | normal                    |
| <b>0.014</b> | 0.008           | 0.023           | 18                        | 16                      | normal                    |
| <b>0.056</b> | 0.043           | 0.071           | 1                         | 4                       | normal                    |
| <b>0.012</b> | 0.007           | 0.019421        | 1                         | 8                       | normal                    |
| <b>0.006</b> | 0.002           | 0.013           | 1                         | 12                      | normal                    |
| <b>0.006</b> | 0.002           | 0.013           | 1                         | 16                      | normal                    |
| <b>0.051</b> | 0.037           | 0.066           | 6                         | 4                       | uniform                   |
| <b>0.054</b> | 0.041           | 0.07            | 6                         | 8                       | uniform                   |
| <b>0.059</b> | 0.046           | 0.076           | 6                         | 12                      | uniform                   |
| <b>0.058</b> | 0.044           | 0.074           | 6                         | 16                      | uniform                   |
| <b>0.025</b> | 0.016498        | 0.036418        | 10                        | 4                       | uniform                   |
| <b>0.02</b>  | 0.013           | 0.03            | 10                        | 8                       | uniform                   |
| <b>0.025</b> | 0.017           | 0.036           | 10                        | 12                      | uniform                   |
| <b>0.026</b> | 0.017           | 0.037           | 10                        | 16                      | uniform                   |
| <b>0.015</b> | 0.009           | 0.025           | 14                        | 4                       | uniform                   |
| <b>0.02</b>  | 0.012           | 0.029           | 14                        | 8                       | uniform                   |
| <b>0.016</b> | 0.009263        | 0.027           | 14                        | 12                      | uniform                   |
| <b>0.022</b> | 0.014           | 0.034           | 14                        | 16                      | uniform                   |
| <b>0.018</b> | 0.011           | 0.028           | 20                        | 4                       | uniform                   |
| <b>0.013</b> | 0.007           | 0.022           | 20                        | 8                       | uniform                   |
| <b>0.011</b> | 0.006           | 0.018           | 20                        | 12                      | uniform                   |
| <b>0.018</b> | 0.011           | 0.028683        | 20                        | 16                      | uniform                   |
| <b>0.053</b> | 0.041           | 0.068           | 1                         | 4                       | uniform                   |
| <b>0.009</b> | 0.005           | 0.016495        | 1                         | 8                       | uniform                   |
| <b>0.004</b> | 0.001           | 0.010129        | 1                         | 12                      | uniform                   |
| <b>0.008</b> | 0.004           | 0.015           | 1                         | 16                      | uniform                   |



|              |          |          |    |    |             |
|--------------|----------|----------|----|----|-------------|
| <b>0.056</b> | 0.043    | 0.07     | 6  | 4  | exponential |
| <b>0.056</b> | 0.043792 | 0.075    | 6  | 8  | exponential |
| <b>0.061</b> | 0.048    | 0.077    | 6  | 12 | exponential |
| <b>0.045</b> | 0.033    | 0.059    | 6  | 16 | exponential |
| <b>0.02</b>  | 0.013    | 0.031    | 10 | 4  | exponential |
| <b>0.019</b> | 0.011    | 0.028    | 10 | 8  | exponential |
| <b>0.028</b> | 0.019    | 0.039    | 10 | 12 | exponential |
| <b>0.03</b>  | 0.02     | 0.042    | 10 | 16 | exponential |
| <b>0.015</b> | 0.009    | 0.023271 | 14 | 4  | exponential |
| <b>0.02</b>  | 0.013    | 0.031    | 14 | 8  | exponential |
| <b>0.022</b> | 0.014    | 0.033    | 14 | 12 | exponential |
| <b>0.015</b> | 0.009    | 0.025    | 14 | 16 | exponential |
| <b>0.013</b> | 0.008    | 0.023    | 20 | 4  | exponential |
| <b>0.014</b> | 0.007    | 0.023    | 20 | 8  | exponential |
| <b>0.011</b> | 0.005547 | 0.02     | 20 | 12 | exponential |
| <b>0.016</b> | 0.009    | 0.025    | 20 | 16 | exponential |
| <b>0.051</b> | 0.039    | 0.066081 | 1  | 4  | exponential |
| <b>0.016</b> | 0.01     | 0.026    | 1  | 8  | exponential |
| <b>0.005</b> | 0.002    | 0.011    | 1  | 12 | exponential |
| <b>0.006</b> | 0.003    | 0.012957 | 1  | 16 | exponential |

94

95 *Supplemental Table 1: FWER of our approach for all parameters of the MC simulation.*

| Power | Lower CI | Upper CI | Number of Subjects | Number of Trials | Target Effect | Noise Distribution |
|-------|----------|----------|--------------------|------------------|---------------|--------------------|
| 0.186 | 0.163    | 0.209265 | 6                  | 4                | 0.5           | Normal             |
| 0.305 | 0.277579 | 0.334477 | 6                  | 4                | 0.65          | Normal             |
| 0.553 | 0.523    | 0.581737 | 6                  | 4                | 0.8           | normal             |
| 0.16  | 0.139    | 0.185    | 6                  | 8                | 0.5           | normal             |
| 0.3   | 0.273    | 0.33     | 6                  | 8                | 0.65          | normal             |
| 0.555 | 0.527566 | 0.586993 | 6                  | 8                | 0.8           | normal             |
| 0.182 | 0.156    | 0.207    | 6                  | 12               | 0.5           | normal             |
| 0.333 | 0.306    | 0.362    | 6                  | 12               | 0.65          | normal             |
| 0.566 | 0.535548 | 0.599    | 6                  | 12               | 0.8           | normal             |
| 0.222 | 0.195    | 0.248    | 6                  | 16               | 0.5           | normal             |
| 0.372 | 0.344    | 0.4      | 6                  | 16               | 0.65          | normal             |
| 0.622 | 0.590336 | 0.650301 | 6                  | 16               | 0.8           | normal             |
| 0.15  | 0.131    | 0.174    | 10                 | 4                | 0.5           | normal             |
| 0.357 | 0.33     | 0.389701 | 10                 | 4                | 0.65          | normal             |
| 0.527 | 0.497    | 0.558    | 10                 | 4                | 0.8           | normal             |
| 0.151 | 0.128    | 0.174642 | 10                 | 8                | 0.5           | normal             |
| 0.366 | 0.338844 | 0.394    | 10                 | 8                | 0.65          | normal             |
| 0.497 | 0.463    | 0.526167 | 10                 | 8                | 0.8           | normal             |
| 0.164 | 0.142    | 0.187    | 10                 | 12               | 0.5           | normal             |
| 0.424 | 0.396142 | 0.454    | 10                 | 12               | 0.65          | normal             |
| 0.591 | 0.561    | 0.618    | 10                 | 12               | 0.8           | normal             |
| 0.184 | 0.16215  | 0.209001 | 10                 | 16               | 0.5           | normal             |
| 0.424 | 0.391    | 0.453    | 10                 | 16               | 0.65          | normal             |
| 0.597 | 0.568    | 0.625    | 10                 | 16               | 0.8           | normal             |
| 0.16  | 0.14     | 0.182    | 14                 | 4                | 0.5           | normal             |
| 0.325 | 0.295    | 0.353    | 14                 | 4                | 0.65          | normal             |
| 0.554 | 0.519    | 0.582    | 14                 | 4                | 0.8           | normal             |
| 0.161 | 0.138    | 0.186    | 14                 | 8                | 0.5           | normal             |
| 0.306 | 0.28     | 0.335464 | 14                 | 8                | 0.65          | normal             |
| 0.557 | 0.527265 | 0.588    | 14                 | 8                | 0.8           | normal             |
| 0.165 | 0.143    | 0.189    | 14                 | 12               | 0.5           | normal             |
| 0.365 | 0.331    | 0.394    | 14                 | 12               | 0.65          | normal             |
| 0.619 | 0.589    | 0.647    | 14                 | 12               | 0.8           | normal             |
| 0.213 | 0.188266 | 0.239    | 14                 | 16               | 0.5           | normal             |
| 0.4   | 0.371253 | 0.431    | 14                 | 16               | 0.65          | normal             |
| 0.683 | 0.656    | 0.715    | 14                 | 16               | 0.8           | normal             |
| 0.212 | 0.19     | 0.23738  | 20                 | 4                | 0.5           | normal             |
| 0.458 | 0.428    | 0.488    | 20                 | 4                | 0.65          | normal             |
| 0.756 | 0.73     | 0.782    | 20                 | 4                | 0.8           | normal             |
| 0.179 | 0.154487 | 0.204    | 20                 | 8                | 0.5           | normal             |

|              |          |          |    |    |      |         |
|--------------|----------|----------|----|----|------|---------|
| <b>0.395</b> | 0.364184 | 0.424966 | 20 | 8  | 0.65 | normal  |
| <b>0.707</b> | 0.680221 | 0.738    | 20 | 8  | 0.8  | normal  |
| <b>0.221</b> | 0.194    | 0.25     | 20 | 12 | 0.5  | normal  |
| <b>0.504</b> | 0.471959 | 0.533    | 20 | 12 | 0.65 | normal  |
| <b>0.775</b> | 0.752    | 0.802    | 20 | 12 | 0.8  | normal  |
| <b>0.279</b> | 0.252675 | 0.306    | 20 | 16 | 0.5  | normal  |
| <b>0.552</b> | 0.522    | 0.584    | 20 | 16 | 0.65 | normal  |
| <b>0.825</b> | 0.8      | 0.847    | 20 | 16 | 0.8  | normal  |
| <b>0.114</b> | 0.096    | 0.135    | 1  | 4  | 0.5  | normal  |
| <b>0.263</b> | 0.239    | 0.291348 | 1  | 4  | 0.65 | normal  |
| <b>0.263</b> | 0.235321 | 0.29     | 1  | 4  | 0.8  | normal  |
| <b>0.11</b>  | 0.091    | 0.13     | 1  | 8  | 0.5  | normal  |
| <b>0.211</b> | 0.185    | 0.236767 | 1  | 8  | 0.65 | normal  |
| <b>0.398</b> | 0.365127 | 0.43     | 1  | 8  | 0.8  | normal  |
| <b>0.241</b> | 0.213    | 0.269347 | 1  | 12 | 0.5  | normal  |
| <b>0.533</b> | 0.504    | 0.564    | 1  | 12 | 0.65 | normal  |
| <b>0.755</b> | 0.726345 | 0.779    | 1  | 12 | 0.8  | normal  |
| <b>0.386</b> | 0.355    | 0.418    | 1  | 16 | 0.5  | normal  |
| <b>0.625</b> | 0.597    | 0.654    | 1  | 16 | 0.65 | normal  |
| <b>0.832</b> | 0.807    | 0.854    | 1  | 16 | 0.8  | normal  |
| <b>0.172</b> | 0.148    | 0.194703 | 6  | 4  | 0.5  | uniform |
| <b>0.323</b> | 0.296    | 0.353    | 6  | 4  | 0.65 | uniform |
| <b>0.552</b> | 0.52     | 0.581657 | 6  | 4  | 0.8  | uniform |
| <b>0.173</b> | 0.15     | 0.196    | 6  | 8  | 0.5  | uniform |
| <b>0.294</b> | 0.264    | 0.322    | 6  | 8  | 0.65 | uniform |
| <b>0.53</b>  | 0.502    | 0.561    | 6  | 8  | 0.8  | uniform |
| <b>0.211</b> | 0.184906 | 0.239    | 6  | 12 | 0.5  | uniform |
| <b>0.367</b> | 0.337956 | 0.396631 | 6  | 12 | 0.65 | uniform |
| <b>0.621</b> | 0.593    | 0.652    | 6  | 12 | 0.8  | uniform |
| <b>0.197</b> | 0.173    | 0.223    | 6  | 16 | 0.5  | uniform |
| <b>0.376</b> | 0.346    | 0.404    | 6  | 16 | 0.65 | uniform |
| <b>0.618</b> | 0.586    | 0.648    | 6  | 16 | 0.8  | uniform |
| <b>0.17</b>  | 0.148672 | 0.194    | 10 | 4  | 0.5  | uniform |
| <b>0.374</b> | 0.347    | 0.405    | 10 | 4  | 0.65 | uniform |
| <b>0.538</b> | 0.502484 | 0.569344 | 10 | 4  | 0.8  | uniform |
| <b>0.149</b> | 0.128    | 0.17     | 10 | 8  | 0.5  | uniform |
| <b>0.33</b>  | 0.302    | 0.359    | 10 | 8  | 0.65 | uniform |
| <b>0.509</b> | 0.479    | 0.54     | 10 | 8  | 0.8  | uniform |
| <b>0.161</b> | 0.138    | 0.184    | 10 | 12 | 0.5  | uniform |
| <b>0.365</b> | 0.334    | 0.397    | 10 | 12 | 0.65 | uniform |
| <b>0.563</b> | 0.5324   | 0.592    | 10 | 12 | 0.8  | uniform |

|              |          |          |    |    |      |             |
|--------------|----------|----------|----|----|------|-------------|
| <b>0.168</b> | 0.145    | 0.196    | 10 | 16 | 0.5  | uniform     |
| <b>0.445</b> | 0.415682 | 0.476    | 10 | 16 | 0.65 | uniform     |
| <b>0.625</b> | 0.592782 | 0.653    | 10 | 16 | 0.8  | uniform     |
| <b>0.15</b>  | 0.129    | 0.172    | 14 | 4  | 0.5  | uniform     |
| <b>0.311</b> | 0.281    | 0.339    | 14 | 4  | 0.65 | uniform     |
| <b>0.563</b> | 0.534    | 0.594    | 14 | 4  | 0.8  | uniform     |
| <b>0.164</b> | 0.141    | 0.189765 | 14 | 8  | 0.5  | uniform     |
| <b>0.318</b> | 0.292    | 0.347    | 14 | 8  | 0.65 | uniform     |
| <b>0.542</b> | 0.509    | 0.572204 | 14 | 8  | 0.8  | uniform     |
| <b>0.201</b> | 0.178    | 0.229468 | 14 | 12 | 0.5  | uniform     |
| <b>0.372</b> | 0.342654 | 0.40253  | 14 | 12 | 0.65 | uniform     |
| <b>0.633</b> | 0.603    | 0.662    | 14 | 12 | 0.8  | uniform     |
| <b>0.204</b> | 0.178415 | 0.232    | 14 | 16 | 0.5  | uniform     |
| <b>0.395</b> | 0.366    | 0.427    | 14 | 16 | 0.65 | uniform     |
| <b>0.661</b> | 0.63     | 0.69     | 14 | 16 | 0.8  | uniform     |
| <b>0.215</b> | 0.191    | 0.239    | 20 | 4  | 0.5  | uniform     |
| <b>0.45</b>  | 0.420021 | 0.48     | 20 | 4  | 0.65 | uniform     |
| <b>0.734</b> | 0.706    | 0.761    | 20 | 4  | 0.8  | uniform     |
| <b>0.188</b> | 0.166    | 0.21     | 20 | 8  | 0.5  | uniform     |
| <b>0.404</b> | 0.374778 | 0.434    | 20 | 8  | 0.65 | uniform     |
| <b>0.691</b> | 0.665    | 0.717    | 20 | 8  | 0.8  | uniform     |
| <b>0.223</b> | 0.197136 | 0.248    | 20 | 12 | 0.5  | uniform     |
| <b>0.48</b>  | 0.447    | 0.510855 | 20 | 12 | 0.65 | uniform     |
| <b>0.772</b> | 0.744    | 0.797    | 20 | 12 | 0.8  | uniform     |
| <b>0.281</b> | 0.252    | 0.30665  | 20 | 16 | 0.5  | uniform     |
| <b>0.548</b> | 0.516499 | 0.577177 | 20 | 16 | 0.65 | uniform     |
| <b>0.823</b> | 0.799    | 0.843    | 20 | 16 | 0.8  | uniform     |
| <b>0.102</b> | 0.084    | 0.122    | 1  | 4  | 0.5  | uniform     |
| <b>0.265</b> | 0.239    | 0.29     | 1  | 4  | 0.65 | uniform     |
| <b>0.265</b> | 0.237    | 0.293298 | 1  | 4  | 0.8  | uniform     |
| <b>0.122</b> | 0.104    | 0.145    | 1  | 8  | 0.5  | uniform     |
| <b>0.208</b> | 0.183623 | 0.234    | 1  | 8  | 0.65 | uniform     |
| <b>0.366</b> | 0.335    | 0.398    | 1  | 8  | 0.8  | uniform     |
| <b>0.251</b> | 0.222257 | 0.279    | 1  | 12 | 0.5  | uniform     |
| <b>0.529</b> | 0.498    | 0.559856 | 1  | 12 | 0.65 | uniform     |
| <b>0.733</b> | 0.706    | 0.758    | 1  | 12 | 0.8  | uniform     |
| <b>0.383</b> | 0.355    | 0.415    | 1  | 16 | 0.5  | uniform     |
| <b>0.626</b> | 0.597    | 0.658    | 1  | 16 | 0.65 | uniform     |
| <b>0.832</b> | 0.806    | 0.853    | 1  | 16 | 0.8  | uniform     |
| <b>0.185</b> | 0.160541 | 0.21054  | 6  | 4  | 0.5  | exponential |
| <b>0.298</b> | 0.271    | 0.332    | 6  | 4  | 0.65 | exponential |

|              |          |          |    |    |      |             |
|--------------|----------|----------|----|----|------|-------------|
| <b>0.567</b> | 0.53669  | 0.598    | 6  | 4  | 0.8  | exponential |
| <b>0.2</b>   | 0.177    | 0.225    | 6  | 8  | 0.5  | exponential |
| <b>0.308</b> | 0.28     | 0.34     | 6  | 8  | 0.65 | exponential |
| <b>0.559</b> | 0.527    | 0.587437 | 6  | 8  | 0.8  | exponential |
| <b>0.184</b> | 0.159    | 0.207562 | 6  | 12 | 0.5  | exponential |
| <b>0.315</b> | 0.283702 | 0.342    | 6  | 12 | 0.65 | exponential |
| <b>0.567</b> | 0.536031 | 0.596843 | 6  | 12 | 0.8  | exponential |
| <b>0.199</b> | 0.176    | 0.225538 | 6  | 16 | 0.5  | exponential |
| <b>0.343</b> | 0.314    | 0.374    | 6  | 16 | 0.65 | exponential |
| <b>0.606</b> | 0.575    | 0.636    | 6  | 16 | 0.8  | exponential |
| <b>0.162</b> | 0.14     | 0.186    | 10 | 4  | 0.5  | exponential |
| <b>0.357</b> | 0.327    | 0.388    | 10 | 4  | 0.65 | exponential |
| <b>0.526</b> | 0.497    | 0.56     | 10 | 4  | 0.8  | exponential |
| <b>0.151</b> | 0.129    | 0.173    | 10 | 8  | 0.5  | exponential |
| <b>0.334</b> | 0.305    | 0.365    | 10 | 8  | 0.65 | exponential |
| <b>0.505</b> | 0.472    | 0.535    | 10 | 8  | 0.8  | exponential |
| <b>0.168</b> | 0.146    | 0.193    | 10 | 12 | 0.5  | exponential |
| <b>0.398</b> | 0.365462 | 0.428433 | 10 | 12 | 0.65 | exponential |
| <b>0.57</b>  | 0.541    | 0.602    | 10 | 12 | 0.8  | exponential |
| <b>0.194</b> | 0.171198 | 0.223456 | 10 | 16 | 0.5  | exponential |
| <b>0.416</b> | 0.38434  | 0.448    | 10 | 16 | 0.65 | exponential |
| <b>0.614</b> | 0.584    | 0.642    | 10 | 16 | 0.8  | exponential |
| <b>0.159</b> | 0.138    | 0.183    | 14 | 4  | 0.5  | exponential |
| <b>0.326</b> | 0.297    | 0.354    | 14 | 4  | 0.65 | exponential |
| <b>0.58</b>  | 0.547    | 0.611    | 14 | 4  | 0.8  | exponential |
| <b>0.149</b> | 0.128    | 0.172411 | 14 | 8  | 0.5  | exponential |
| <b>0.312</b> | 0.285    | 0.344    | 14 | 8  | 0.65 | exponential |
| <b>0.55</b>  | 0.51612  | 0.579    | 14 | 8  | 0.8  | exponential |
| <b>0.19</b>  | 0.166173 | 0.214    | 14 | 12 | 0.5  | exponential |
| <b>0.361</b> | 0.331255 | 0.39     | 14 | 12 | 0.65 | exponential |
| <b>0.614</b> | 0.584    | 0.642    | 14 | 12 | 0.8  | exponential |
| <b>0.219</b> | 0.195    | 0.247    | 14 | 16 | 0.5  | exponential |
| <b>0.42</b>  | 0.388221 | 0.45     | 14 | 16 | 0.65 | exponential |
| <b>0.706</b> | 0.677    | 0.733764 | 14 | 16 | 0.8  | exponential |
| <b>0.232</b> | 0.205    | 0.257626 | 20 | 4  | 0.5  | exponential |
| <b>0.466</b> | 0.436    | 0.496174 | 20 | 4  | 0.65 | exponential |
| <b>0.76</b>  | 0.733    | 0.784523 | 20 | 4  | 0.8  | exponential |
| <b>0.186</b> | 0.163    | 0.212    | 20 | 8  | 0.5  | exponential |
| <b>0.391</b> | 0.364    | 0.42     | 20 | 8  | 0.65 | exponential |
| <b>0.695</b> | 0.668    | 0.722762 | 20 | 8  | 0.8  | exponential |
| <b>0.228</b> | 0.202552 | 0.253121 | 20 | 12 | 0.5  | exponential |

|              |          |          |    |    |      |             |
|--------------|----------|----------|----|----|------|-------------|
| <b>0.477</b> | 0.447    | 0.505    | 20 | 12 | 0.65 | exponential |
| <b>0.793</b> | 0.766    | 0.816    | 20 | 12 | 0.8  | exponential |
| <b>0.266</b> | 0.239    | 0.292    | 20 | 16 | 0.5  | exponential |
| <b>0.541</b> | 0.512    | 0.573    | 20 | 16 | 0.65 | exponential |
| <b>0.824</b> | 0.802    | 0.846    | 20 | 16 | 0.8  | exponential |
| <b>0.115</b> | 0.097    | 0.135    | 1  | 4  | 0.5  | exponential |
| <b>0.278</b> | 0.251    | 0.307    | 1  | 4  | 0.65 | exponential |
| <b>0.278</b> | 0.249455 | 0.306    | 1  | 4  | 0.8  | exponential |
| <b>0.115</b> | 0.096    | 0.135    | 1  | 8  | 0.5  | exponential |
| <b>0.209</b> | 0.186787 | 0.234832 | 1  | 8  | 0.65 | exponential |
| <b>0.394</b> | 0.363    | 0.425    | 1  | 8  | 0.8  | exponential |
| <b>0.227</b> | 0.204    | 0.256    | 1  | 12 | 0.5  | exponential |
| <b>0.509</b> | 0.477    | 0.539    | 1  | 12 | 0.65 | exponential |
| <b>0.744</b> | 0.714    | 0.768    | 1  | 12 | 0.8  | exponential |
| <b>0.398</b> | 0.367078 | 0.429    | 1  | 16 | 0.5  | exponential |
| <b>0.653</b> | 0.626    | 0.682    | 1  | 16 | 0.65 | exponential |
| <b>0.842</b> | 0.818    | 0.864866 | 1  | 16 | 0.8  | exponential |

96

97 *Supplemental Table 2. Power of our approach for the synthetic data with the multivariate effect*98 *introduced over 2 time-points, specifically TRs 5 and 6. We report values for all trials numbers,*99 *subject groups, noise distributions and % of data showing the effect.*

| Power | Lower CI | Upper CI | Number of Subjects | Number of Trials | Target Effect | Noise Distribution |
|-------|----------|----------|--------------------|------------------|---------------|--------------------|
| 0.154 | 0.134    | 0.177    | 6                  | 4                | 0.5           | normal             |
| 0.271 | 0.245    | 0.3      | 6                  | 4                | 0.65          | normal             |
| 0.517 | 0.486    | 0.547948 | 6                  | 4                | 0.8           | normal             |
| 0.157 | 0.137    | 0.183    | 6                  | 8                | 0.5           | normal             |
| 0.294 | 0.266    | 0.324274 | 6                  | 8                | 0.65          | normal             |
| 0.518 | 0.486    | 0.547    | 6                  | 8                | 0.8           | normal             |
| 0.196 | 0.172    | 0.222    | 6                  | 12               | 0.5           | normal             |
| 0.335 | 0.308    | 0.366926 | 6                  | 12               | 0.65          | normal             |
| 0.588 | 0.557    | 0.618818 | 6                  | 12               | 0.8           | normal             |
| 0.186 | 0.162    | 0.211    | 6                  | 16               | 0.5           | normal             |
| 0.344 | 0.315    | 0.375    | 6                  | 16               | 0.65          | normal             |
| 0.605 | 0.575    | 0.635    | 6                  | 16               | 0.8           | normal             |
| 0.136 | 0.114    | 0.157    | 10                 | 4                | 0.5           | normal             |
| 0.338 | 0.308767 | 0.366733 | 10                 | 4                | 0.65          | normal             |
| 0.491 | 0.461    | 0.521    | 10                 | 4                | 0.8           | normal             |
| 0.14  | 0.121    | 0.163    | 10                 | 8                | 0.5           | normal             |
| 0.355 | 0.326    | 0.38669  | 10                 | 8                | 0.65          | normal             |
| 0.503 | 0.47     | 0.533    | 10                 | 8                | 0.8           | normal             |
| 0.168 | 0.145    | 0.190731 | 10                 | 12               | 0.5           | normal             |
| 0.401 | 0.369699 | 0.433566 | 10                 | 12               | 0.65          | normal             |
| 0.569 | 0.538    | 0.598723 | 10                 | 12               | 0.8           | normal             |
| 0.18  | 0.157    | 0.205    | 10                 | 16               | 0.5           | normal             |
| 0.418 | 0.389    | 0.449    | 10                 | 16               | 0.65          | normal             |
| 0.59  | 0.56     | 0.62     | 10                 | 16               | 0.8           | normal             |
| 0.112 | 0.092    | 0.132    | 14                 | 4                | 0.5           | normal             |
| 0.24  | 0.214    | 0.266    | 14                 | 4                | 0.65          | normal             |
| 0.475 | 0.442    | 0.505    | 14                 | 4                | 0.8           | normal             |
| 0.157 | 0.135    | 0.18     | 14                 | 8                | 0.5           | normal             |
| 0.309 | 0.283307 | 0.33893  | 14                 | 8                | 0.65          | normal             |
| 0.547 | 0.512    | 0.575    | 14                 | 8                | 0.8           | normal             |
| 0.174 | 0.151    | 0.20025  | 14                 | 12               | 0.5           | normal             |
| 0.334 | 0.306217 | 0.364    | 14                 | 12               | 0.65          | normal             |
| 0.602 | 0.571    | 0.633    | 14                 | 12               | 0.8           | normal             |
| 0.189 | 0.165    | 0.214    | 14                 | 16               | 0.5           | normal             |
| 0.367 | 0.338918 | 0.395    | 14                 | 16               | 0.65          | normal             |
| 0.633 | 0.603    | 0.662    | 14                 | 16               | 0.8           | normal             |
| 0.146 | 0.124668 | 0.169    | 20                 | 4                | 0.5           | normal             |
| 0.328 | 0.301    | 0.358    | 20                 | 4                | 0.65          | normal             |
| 0.586 | 0.554    | 0.616724 | 20                 | 4                | 0.8           | normal             |
| 0.168 | 0.145    | 0.192979 | 20                 | 8                | 0.5           | normal             |

|              |          |          |    |    |      |         |
|--------------|----------|----------|----|----|------|---------|
| <b>0.364</b> | 0.334    | 0.395    | 20 | 8  | 0.65 | normal  |
| <b>0.661</b> | 0.629    | 0.692    | 20 | 8  | 0.8  | normal  |
| <b>0.231</b> | 0.205    | 0.256    | 20 | 12 | 0.5  | normal  |
| <b>0.48</b>  | 0.448    | 0.511    | 20 | 12 | 0.65 | normal  |
| <b>0.758</b> | 0.729839 | 0.783    | 20 | 12 | 0.8  | normal  |
| <b>0.271</b> | 0.243    | 0.298562 | 20 | 16 | 0.5  | normal  |
| <b>0.517</b> | 0.486    | 0.546    | 20 | 16 | 0.65 | normal  |
| <b>0.785</b> | 0.76     | 0.811    | 20 | 16 | 0.8  | normal  |
| <b>0.104</b> | 0.086    | 0.125    | 1  | 4  | 0.5  | normal  |
| <b>0.239</b> | 0.214    | 0.26634  | 1  | 4  | 0.65 | normal  |
| <b>0.239</b> | 0.212    | 0.266    | 1  | 4  | 0.8  | normal  |
| <b>0.104</b> | 0.087    | 0.125    | 1  | 8  | 0.5  | normal  |
| <b>0.213</b> | 0.187    | 0.238    | 1  | 8  | 0.65 | normal  |
| <b>0.349</b> | 0.321    | 0.379    | 1  | 8  | 0.8  | normal  |
| <b>0.171</b> | 0.149    | 0.198    | 1  | 12 | 0.5  | normal  |
| <b>0.418</b> | 0.387    | 0.448    | 1  | 12 | 0.65 | normal  |
| <b>0.719</b> | 0.691    | 0.747    | 1  | 12 | 0.8  | normal  |
| <b>0.284</b> | 0.256    | 0.311    | 1  | 16 | 0.5  | normal  |
| <b>0.51</b>  | 0.477    | 0.538    | 1  | 16 | 0.65 | normal  |
| <b>0.804</b> | 0.778    | 0.827    | 1  | 16 | 0.8  | normal  |
| <b>0.169</b> | 0.146    | 0.192    | 6  | 4  | 0.5  | uniform |
| <b>0.296</b> | 0.269    | 0.328513 | 6  | 4  | 0.65 | uniform |
| <b>0.519</b> | 0.491    | 0.55     | 6  | 4  | 0.8  | uniform |
| <b>0.175</b> | 0.152    | 0.2      | 6  | 8  | 0.5  | uniform |
| <b>0.298</b> | 0.273    | 0.330169 | 6  | 8  | 0.65 | uniform |
| <b>0.556</b> | 0.525    | 0.587    | 6  | 8  | 0.8  | uniform |
| <b>0.205</b> | 0.18     | 0.23     | 6  | 12 | 0.5  | uniform |
| <b>0.358</b> | 0.328    | 0.389821 | 6  | 12 | 0.65 | uniform |
| <b>0.611</b> | 0.584    | 0.641    | 6  | 12 | 0.8  | uniform |
| <b>0.194</b> | 0.171    | 0.220338 | 6  | 16 | 0.5  | uniform |
| <b>0.337</b> | 0.308    | 0.36723  | 6  | 16 | 0.65 | uniform |
| <b>0.601</b> | 0.568    | 0.632411 | 6  | 16 | 0.8  | uniform |
| <b>0.131</b> | 0.113    | 0.154    | 10 | 4  | 0.5  | uniform |
| <b>0.324</b> | 0.29595  | 0.354    | 10 | 4  | 0.65 | uniform |
| <b>0.464</b> | 0.433    | 0.494328 | 10 | 4  | 0.8  | uniform |
| <b>0.132</b> | 0.109    | 0.153    | 10 | 8  | 0.5  | uniform |
| <b>0.325</b> | 0.297    | 0.354    | 10 | 8  | 0.65 | uniform |
| <b>0.503</b> | 0.473    | 0.534    | 10 | 8  | 0.8  | uniform |
| <b>0.157</b> | 0.136    | 0.18     | 10 | 12 | 0.5  | uniform |
| <b>0.356</b> | 0.325199 | 0.382    | 10 | 12 | 0.65 | uniform |
| <b>0.555</b> | 0.522    | 0.585    | 10 | 12 | 0.8  | uniform |



|              |          |          |    |    |      |             |
|--------------|----------|----------|----|----|------|-------------|
| <b>0.175</b> | 0.152    | 0.201    | 10 | 16 | 0.5  | uniform     |
| <b>0.419</b> | 0.389    | 0.448    | 10 | 16 | 0.65 | uniform     |
| <b>0.585</b> | 0.550304 | 0.614    | 10 | 16 | 0.8  | uniform     |
| <b>0.115</b> | 0.094714 | 0.135    | 14 | 4  | 0.5  | uniform     |
| <b>0.244</b> | 0.217321 | 0.271    | 14 | 4  | 0.65 | uniform     |
| <b>0.456</b> | 0.42503  | 0.488    | 14 | 4  | 0.8  | uniform     |
| <b>0.165</b> | 0.143    | 0.188    | 14 | 8  | 0.5  | uniform     |
| <b>0.29</b>  | 0.263    | 0.319    | 14 | 8  | 0.65 | uniform     |
| <b>0.517</b> | 0.486    | 0.55     | 14 | 8  | 0.8  | uniform     |
| <b>0.155</b> | 0.133    | 0.177    | 14 | 12 | 0.5  | uniform     |
| <b>0.339</b> | 0.309685 | 0.369    | 14 | 12 | 0.65 | uniform     |
| <b>0.603</b> | 0.574    | 0.633    | 14 | 12 | 0.8  | uniform     |
| <b>0.221</b> | 0.195    | 0.246    | 14 | 16 | 0.5  | uniform     |
| <b>0.425</b> | 0.395    | 0.455    | 14 | 16 | 0.65 | uniform     |
| <b>0.668</b> | 0.638    | 0.695564 | 14 | 16 | 0.8  | uniform     |
| <b>0.138</b> | 0.117569 | 0.16     | 20 | 4  | 0.5  | uniform     |
| <b>0.302</b> | 0.272584 | 0.331497 | 20 | 4  | 0.65 | uniform     |
| <b>0.559</b> | 0.528561 | 0.589    | 20 | 4  | 0.8  | uniform     |
| <b>0.175</b> | 0.152    | 0.2      | 20 | 8  | 0.5  | uniform     |
| <b>0.366</b> | 0.334125 | 0.397    | 20 | 8  | 0.65 | uniform     |
| <b>0.653</b> | 0.624    | 0.685    | 20 | 8  | 0.8  | uniform     |
| <b>0.191</b> | 0.168    | 0.217    | 20 | 12 | 0.5  | uniform     |
| <b>0.416</b> | 0.386    | 0.447    | 20 | 12 | 0.65 | uniform     |
| <b>0.715</b> | 0.686    | 0.743959 | 20 | 12 | 0.8  | uniform     |
| <b>0.225</b> | 0.2      | 0.251    | 20 | 16 | 0.5  | uniform     |
| <b>0.464</b> | 0.432    | 0.496867 | 20 | 16 | 0.65 | uniform     |
| <b>0.763</b> | 0.737914 | 0.787    | 20 | 16 | 0.8  | uniform     |
| <b>0.11</b>  | 0.091    | 0.132    | 1  | 4  | 0.5  | uniform     |
| <b>0.238</b> | 0.21117  | 0.268    | 1  | 4  | 0.65 | uniform     |
| <b>0.238</b> | 0.211    | 0.267    | 1  | 4  | 0.8  | uniform     |
| <b>0.117</b> | 0.098856 | 0.138    | 1  | 8  | 0.5  | uniform     |
| <b>0.204</b> | 0.178541 | 0.228794 | 1  | 8  | 0.65 | uniform     |
| <b>0.374</b> | 0.344    | 0.404    | 1  | 8  | 0.8  | uniform     |
| <b>0.176</b> | 0.154    | 0.199    | 1  | 12 | 0.5  | uniform     |
| <b>0.435</b> | 0.401    | 0.464    | 1  | 12 | 0.65 | uniform     |
| <b>0.694</b> | 0.666    | 0.721    | 1  | 12 | 0.8  | uniform     |
| <b>0.284</b> | 0.254    | 0.312    | 1  | 16 | 0.5  | uniform     |
| <b>0.52</b>  | 0.489    | 0.548205 | 1  | 16 | 0.65 | uniform     |
| <b>0.808</b> | 0.783    | 0.830532 | 1  | 16 | 0.8  | uniform     |
| <b>0.168</b> | 0.147    | 0.194    | 6  | 4  | 0.5  | exponential |
| <b>0.284</b> | 0.26     | 0.312967 | 6  | 4  | 0.65 | exponential |

|              |          |          |    |    |      |             |
|--------------|----------|----------|----|----|------|-------------|
| <b>0.517</b> | 0.485    | 0.548    | 6  | 4  | 0.8  | exponential |
| <b>0.173</b> | 0.15     | 0.198    | 6  | 8  | 0.5  | exponential |
| <b>0.306</b> | 0.275085 | 0.332    | 6  | 8  | 0.65 | exponential |
| <b>0.542</b> | 0.512865 | 0.572032 | 6  | 8  | 0.8  | exponential |
| <b>0.184</b> | 0.161552 | 0.208    | 6  | 12 | 0.5  | exponential |
| <b>0.337</b> | 0.307    | 0.366135 | 6  | 12 | 0.65 | exponential |
| <b>0.584</b> | 0.553    | 0.617194 | 6  | 12 | 0.8  | exponential |
| <b>0.189</b> | 0.167    | 0.212    | 6  | 16 | 0.5  | exponential |
| <b>0.358</b> | 0.331    | 0.391    | 6  | 16 | 0.65 | exponential |
| <b>0.609</b> | 0.58     | 0.64     | 6  | 16 | 0.8  | exponential |
| <b>0.107</b> | 0.089    | 0.127    | 10 | 4  | 0.5  | exponential |
| <b>0.285</b> | 0.257    | 0.313    | 10 | 4  | 0.65 | exponential |
| <b>0.464</b> | 0.433378 | 0.497    | 10 | 4  | 0.8  | exponential |
| <b>0.157</b> | 0.133    | 0.182    | 10 | 8  | 0.5  | exponential |
| <b>0.34</b>  | 0.31     | 0.370695 | 10 | 8  | 0.65 | exponential |
| <b>0.495</b> | 0.464    | 0.527    | 10 | 8  | 0.8  | exponential |
| <b>0.166</b> | 0.145    | 0.19     | 10 | 12 | 0.5  | exponential |
| <b>0.4</b>   | 0.368    | 0.429    | 10 | 12 | 0.65 | exponential |
| <b>0.57</b>  | 0.541    | 0.600038 | 10 | 12 | 0.8  | exponential |
| <b>0.187</b> | 0.162362 | 0.213    | 10 | 16 | 0.5  | exponential |
| <b>0.439</b> | 0.407    | 0.465    | 10 | 16 | 0.65 | exponential |
| <b>0.595</b> | 0.564    | 0.626    | 10 | 16 | 0.8  | exponential |
| <b>0.128</b> | 0.107    | 0.151    | 14 | 4  | 0.5  | exponential |
| <b>0.252</b> | 0.225    | 0.281552 | 14 | 4  | 0.65 | exponential |
| <b>0.483</b> | 0.453    | 0.516275 | 14 | 4  | 0.8  | exponential |
| <b>0.147</b> | 0.126    | 0.173    | 14 | 8  | 0.5  | exponential |
| <b>0.286</b> | 0.255597 | 0.312    | 14 | 8  | 0.65 | exponential |
| <b>0.542</b> | 0.507405 | 0.571    | 14 | 8  | 0.8  | exponential |
| <b>0.164</b> | 0.14     | 0.188    | 14 | 12 | 0.5  | exponential |
| <b>0.367</b> | 0.337132 | 0.394    | 14 | 12 | 0.65 | exponential |
| <b>0.601</b> | 0.570192 | 0.631    | 14 | 12 | 0.8  | exponential |
| <b>0.187</b> | 0.164    | 0.212    | 14 | 16 | 0.5  | exponential |
| <b>0.372</b> | 0.342    | 0.401    | 14 | 16 | 0.65 | exponential |
| <b>0.657</b> | 0.626    | 0.685    | 14 | 16 | 0.8  | exponential |
| <b>0.157</b> | 0.134    | 0.18     | 20 | 4  | 0.5  | exponential |
| <b>0.324</b> | 0.296    | 0.352658 | 20 | 4  | 0.65 | exponential |
| <b>0.584</b> | 0.552    | 0.612536 | 20 | 4  | 0.8  | exponential |
| <b>0.174</b> | 0.151261 | 0.197    | 20 | 8  | 0.5  | exponential |
| <b>0.354</b> | 0.325    | 0.381133 | 20 | 8  | 0.65 | exponential |
| <b>0.657</b> | 0.629316 | 0.687    | 20 | 8  | 0.8  | exponential |
| <b>0.221</b> | 0.197767 | 0.246    | 20 | 12 | 0.5  | exponential |

|              |          |          |    |    |      |             |
|--------------|----------|----------|----|----|------|-------------|
| <b>0.43</b>  | 0.402    | 0.460781 | 20 | 12 | 0.65 | exponential |
| <b>0.744</b> | 0.715    | 0.771    | 20 | 12 | 0.8  | exponential |
| <b>0.235</b> | 0.210718 | 0.261    | 20 | 16 | 0.5  | exponential |
| <b>0.471</b> | 0.439    | 0.502    | 20 | 16 | 0.65 | exponential |
| <b>0.758</b> | 0.732    | 0.783    | 20 | 16 | 0.8  | exponential |
| <b>0.105</b> | 0.089    | 0.126    | 1  | 4  | 0.5  | exponential |
| <b>0.257</b> | 0.23     | 0.284    | 1  | 4  | 0.65 | exponential |
| <b>0.257</b> | 0.229    | 0.283    | 1  | 4  | 0.8  | exponential |
| <b>0.099</b> | 0.081    | 0.119    | 1  | 8  | 0.5  | exponential |
| <b>0.21</b>  | 0.186    | 0.237    | 1  | 8  | 0.65 | exponential |
| <b>0.343</b> | 0.314451 | 0.372    | 1  | 8  | 0.8  | exponential |
| <b>0.173</b> | 0.151    | 0.197965 | 1  | 12 | 0.5  | exponential |
| <b>0.437</b> | 0.407    | 0.468    | 1  | 12 | 0.65 | exponential |
| <b>0.712</b> | 0.688342 | 0.739842 | 1  | 12 | 0.8  | exponential |
| <b>0.309</b> | 0.281    | 0.335    | 1  | 16 | 0.5  | exponential |
| <b>0.53</b>  | 0.501    | 0.562    | 1  | 16 | 0.65 | exponential |
| <b>0.812</b> | 0.785935 | 0.836    | 1  | 16 | 0.8  | exponential |

100

101 *Supplemental Table 3. Power of our approach for the synthetic data with the multivariate effect*  
102 *introduced over 3 time-points, specifically TRs 5, 6 and 7. We report values for all trials*  
103 *numbers, subject groups, noise distributions and % of data showing the effect.*

| Power | Lower CI | Upper CI | Number of Subjects | Number of Trials | Target Effect | Noise Distribution |
|-------|----------|----------|--------------------|------------------|---------------|--------------------|
| 0.192 | 0.169    | 0.218227 | 6                  | 4                | 0.5           | normal             |
| 0.342 | 0.315    | 0.37     | 6                  | 4                | 0.65          | normal             |
| 0.574 | 0.543    | 0.606    | 6                  | 4                | 0.8           | normal             |
| 0.175 | 0.153    | 0.199    | 6                  | 8                | 0.5           | normal             |
| 0.307 | 0.28     | 0.336    | 6                  | 8                | 0.65          | normal             |
| 0.551 | 0.519    | 0.582    | 6                  | 8                | 0.8           | normal             |
| 0.184 | 0.161    | 0.210626 | 6                  | 12               | 0.5           | normal             |
| 0.351 | 0.321404 | 0.381    | 6                  | 12               | 0.65          | normal             |
| 0.573 | 0.543    | 0.606    | 6                  | 12               | 0.8           | normal             |
| 0.191 | 0.167    | 0.216958 | 6                  | 16               | 0.5           | normal             |
| 0.338 | 0.309    | 0.366    | 6                  | 16               | 0.65          | normal             |
| 0.58  | 0.55     | 0.612    | 6                  | 16               | 0.8           | normal             |
| 0.198 | 0.175    | 0.222    | 10                 | 4                | 0.5           | normal             |
| 0.455 | 0.423    | 0.488    | 10                 | 4                | 0.65          | normal             |
| 0.65  | 0.620633 | 0.679    | 10                 | 4                | 0.8           | normal             |
| 0.167 | 0.144    | 0.191929 | 10                 | 8                | 0.5           | normal             |
| 0.34  | 0.311    | 0.37     | 10                 | 8                | 0.65          | normal             |
| 0.502 | 0.4699   | 0.532296 | 10                 | 8                | 0.8           | normal             |
| 0.162 | 0.140681 | 0.185485 | 10                 | 12               | 0.5           | normal             |
| 0.398 | 0.363612 | 0.427    | 10                 | 12               | 0.65          | normal             |
| 0.575 | 0.542909 | 0.606    | 10                 | 12               | 0.8           | normal             |
| 0.184 | 0.161848 | 0.212    | 10                 | 16               | 0.5           | normal             |
| 0.42  | 0.386624 | 0.449    | 10                 | 16               | 0.65          | normal             |
| 0.611 | 0.579144 | 0.639    | 10                 | 16               | 0.8           | normal             |
| 0.215 | 0.191    | 0.241537 | 14                 | 4                | 0.5           | normal             |
| 0.412 | 0.382    | 0.441    | 14                 | 4                | 0.65          | normal             |
| 0.699 | 0.669902 | 0.727    | 14                 | 4                | 0.8           | normal             |
| 0.155 | 0.132    | 0.18     | 14                 | 8                | 0.5           | normal             |
| 0.309 | 0.283    | 0.337    | 14                 | 8                | 0.65          | normal             |
| 0.581 | 0.549482 | 0.609    | 14                 | 8                | 0.8           | normal             |
| 0.189 | 0.167    | 0.214    | 14                 | 12               | 0.5           | normal             |
| 0.372 | 0.343    | 0.4      | 14                 | 12               | 0.65          | normal             |
| 0.644 | 0.614    | 0.671    | 14                 | 12               | 0.8           | normal             |
| 0.212 | 0.187    | 0.238    | 14                 | 16               | 0.5           | normal             |
| 0.403 | 0.372268 | 0.432    | 14                 | 16               | 0.65          | normal             |
| 0.674 | 0.644    | 0.702    | 14                 | 16               | 0.8           | normal             |
| 0.282 | 0.253452 | 0.311    | 20                 | 4                | 0.5           | normal             |
| 0.567 | 0.535    | 0.6      | 20                 | 4                | 0.65          | normal             |
| 0.856 | 0.835    | 0.876    | 20                 | 4                | 0.8           | normal             |
| 0.201 | 0.174908 | 0.225795 | 20                 | 8                | 0.5           | normal             |

|              |          |          |    |    |      |         |
|--------------|----------|----------|----|----|------|---------|
| <b>0.411</b> | 0.381    | 0.44     | 20 | 8  | 0.65 | normal  |
| <b>0.707</b> | 0.679    | 0.734908 | 20 | 8  | 0.8  | normal  |
| <b>0.221</b> | 0.197    | 0.248    | 20 | 12 | 0.5  | normal  |
| <b>0.486</b> | 0.453364 | 0.514    | 20 | 12 | 0.65 | normal  |
| <b>0.781</b> | 0.754069 | 0.805    | 20 | 12 | 0.8  | normal  |
| <b>0.279</b> | 0.251    | 0.307    | 20 | 16 | 0.5  | normal  |
| <b>0.54</b>  | 0.507067 | 0.571    | 20 | 16 | 0.65 | normal  |
| <b>0.846</b> | 0.821    | 0.865    | 20 | 16 | 0.8  | normal  |
| <b>0.102</b> | 0.085    | 0.121935 | 1  | 4  | 0.5  | normal  |
| <b>0.256</b> | 0.23     | 0.284592 | 1  | 4  | 0.65 | normal  |
| <b>0.256</b> | 0.228989 | 0.282    | 1  | 4  | 0.8  | normal  |
| <b>0.124</b> | 0.105    | 0.145    | 1  | 8  | 0.5  | normal  |
| <b>0.212</b> | 0.186223 | 0.24     | 1  | 8  | 0.65 | normal  |
| <b>0.388</b> | 0.358    | 0.42     | 1  | 8  | 0.8  | normal  |
| <b>0.244</b> | 0.215291 | 0.269467 | 1  | 12 | 0.5  | normal  |
| <b>0.513</b> | 0.483    | 0.542875 | 1  | 12 | 0.65 | normal  |
| <b>0.727</b> | 0.696    | 0.754    | 1  | 12 | 0.8  | normal  |
| <b>0.39</b>  | 0.359    | 0.419    | 1  | 16 | 0.5  | normal  |
| <b>0.62</b>  | 0.588    | 0.651    | 1  | 16 | 0.65 | normal  |
| <b>0.821</b> | 0.798    | 0.844    | 1  | 16 | 0.8  | normal  |
| <b>0.185</b> | 0.162    | 0.211533 | 6  | 4  | 0.5  | uniform |
| <b>0.334</b> | 0.304    | 0.361    | 6  | 4  | 0.65 | uniform |
| <b>0.603</b> | 0.573    | 0.635    | 6  | 4  | 0.8  | uniform |
| <b>0.161</b> | 0.139    | 0.184033 | 6  | 8  | 0.5  | uniform |
| <b>0.311</b> | 0.282542 | 0.340442 | 6  | 8  | 0.65 | uniform |
| <b>0.549</b> | 0.52     | 0.582    | 6  | 8  | 0.8  | uniform |
| <b>0.184</b> | 0.16     | 0.207    | 6  | 12 | 0.5  | uniform |
| <b>0.331</b> | 0.303763 | 0.361    | 6  | 12 | 0.65 | uniform |
| <b>0.575</b> | 0.545    | 0.607    | 6  | 12 | 0.8  | uniform |
| <b>0.177</b> | 0.155    | 0.203    | 6  | 16 | 0.5  | uniform |
| <b>0.336</b> | 0.308    | 0.367    | 6  | 16 | 0.65 | uniform |
| <b>0.564</b> | 0.532    | 0.596    | 6  | 16 | 0.8  | uniform |
| <b>0.192</b> | 0.168187 | 0.218    | 10 | 4  | 0.5  | uniform |
| <b>0.418</b> | 0.39     | 0.45     | 10 | 4  | 0.65 | uniform |
| <b>0.617</b> | 0.585    | 0.647    | 10 | 4  | 0.8  | uniform |
| <b>0.156</b> | 0.133    | 0.179    | 10 | 8  | 0.5  | uniform |
| <b>0.381</b> | 0.350381 | 0.409    | 10 | 8  | 0.65 | uniform |
| <b>0.534</b> | 0.502717 | 0.566    | 10 | 8  | 0.8  | uniform |
| <b>0.163</b> | 0.141    | 0.189    | 10 | 12 | 0.5  | uniform |
| <b>0.362</b> | 0.332    | 0.393    | 10 | 12 | 0.65 | uniform |
| <b>0.559</b> | 0.531    | 0.59     | 10 | 12 | 0.8  | uniform |

|              |          |          |    |    |      |             |
|--------------|----------|----------|----|----|------|-------------|
| <b>0.208</b> | 0.185    | 0.237    | 10 | 16 | 0.5  | uniform     |
| <b>0.451</b> | 0.422    | 0.482    | 10 | 16 | 0.65 | uniform     |
| <b>0.616</b> | 0.587    | 0.647    | 10 | 16 | 0.8  | uniform     |
| <b>0.213</b> | 0.188    | 0.238    | 14 | 4  | 0.5  | uniform     |
| <b>0.434</b> | 0.402    | 0.467    | 14 | 4  | 0.65 | uniform     |
| <b>0.726</b> | 0.698    | 0.753    | 14 | 4  | 0.8  | uniform     |
| <b>0.163</b> | 0.139384 | 0.187    | 14 | 8  | 0.5  | uniform     |
| <b>0.311</b> | 0.283    | 0.338    | 14 | 8  | 0.65 | uniform     |
| <b>0.569</b> | 0.538    | 0.600186 | 14 | 8  | 0.8  | uniform     |
| <b>0.184</b> | 0.161    | 0.209    | 14 | 12 | 0.5  | uniform     |
| <b>0.354</b> | 0.325    | 0.383    | 14 | 12 | 0.65 | uniform     |
| <b>0.61</b>  | 0.577    | 0.638514 | 14 | 12 | 0.8  | uniform     |
| <b>0.2</b>   | 0.176    | 0.228652 | 14 | 16 | 0.5  | uniform     |
| <b>0.384</b> | 0.354    | 0.413    | 14 | 16 | 0.65 | uniform     |
| <b>0.681</b> | 0.654    | 0.709    | 14 | 16 | 0.8  | uniform     |
| <b>0.284</b> | 0.257559 | 0.313    | 20 | 4  | 0.5  | uniform     |
| <b>0.593</b> | 0.559692 | 0.622    | 20 | 4  | 0.65 | uniform     |
| <b>0.859</b> | 0.836    | 0.879    | 20 | 4  | 0.8  | uniform     |
| <b>0.228</b> | 0.202    | 0.253    | 20 | 8  | 0.5  | uniform     |
| <b>0.44</b>  | 0.409    | 0.47064  | 20 | 8  | 0.65 | uniform     |
| <b>0.748</b> | 0.721    | 0.775    | 20 | 8  | 0.8  | uniform     |
| <b>0.224</b> | 0.2      | 0.249    | 20 | 12 | 0.5  | uniform     |
| <b>0.495</b> | 0.463    | 0.527237 | 20 | 12 | 0.65 | uniform     |
| <b>0.778</b> | 0.749    | 0.803    | 20 | 12 | 0.8  | uniform     |
| <b>0.266</b> | 0.24     | 0.295    | 20 | 16 | 0.5  | uniform     |
| <b>0.532</b> | 0.501    | 0.560913 | 20 | 16 | 0.65 | uniform     |
| <b>0.818</b> | 0.793256 | 0.842942 | 20 | 16 | 0.8  | uniform     |
| <b>0.091</b> | 0.075    | 0.109    | 1  | 4  | 0.5  | uniform     |
| <b>0.246</b> | 0.222    | 0.273    | 1  | 4  | 0.65 | uniform     |
| <b>0.246</b> | 0.219    | 0.272    | 1  | 4  | 0.8  | uniform     |
| <b>0.121</b> | 0.104    | 0.143    | 1  | 8  | 0.5  | uniform     |
| <b>0.214</b> | 0.19     | 0.240177 | 1  | 8  | 0.65 | uniform     |
| <b>0.373</b> | 0.345    | 0.406811 | 1  | 8  | 0.8  | uniform     |
| <b>0.245</b> | 0.218    | 0.272913 | 1  | 12 | 0.5  | uniform     |
| <b>0.521</b> | 0.49     | 0.552112 | 1  | 12 | 0.65 | uniform     |
| <b>0.713</b> | 0.685    | 0.74     | 1  | 12 | 0.8  | uniform     |
| <b>0.406</b> | 0.376    | 0.437    | 1  | 16 | 0.5  | uniform     |
| <b>0.619</b> | 0.589    | 0.648    | 1  | 16 | 0.65 | uniform     |
| <b>0.809</b> | 0.783439 | 0.832    | 1  | 16 | 0.8  | uniform     |
| <b>0.186</b> | 0.164277 | 0.21     | 6  | 4  | 0.5  | exponential |
| <b>0.348</b> | 0.321    | 0.3785   | 6  | 4  | 0.65 | exponential |

|              |          |          |    |    |      |             |
|--------------|----------|----------|----|----|------|-------------|
| <b>0.605</b> | 0.572    | 0.633    | 6  | 4  | 0.8  | exponential |
| <b>0.177</b> | 0.154    | 0.202    | 6  | 8  | 0.5  | exponential |
| <b>0.323</b> | 0.29578  | 0.352    | 6  | 8  | 0.65 | exponential |
| <b>0.58</b>  | 0.549    | 0.611    | 6  | 8  | 0.8  | exponential |
| <b>0.187</b> | 0.162    | 0.212    | 6  | 12 | 0.5  | exponential |
| <b>0.336</b> | 0.306327 | 0.363    | 6  | 12 | 0.65 | exponential |
| <b>0.566</b> | 0.537    | 0.597176 | 6  | 12 | 0.8  | exponential |
| <b>0.187</b> | 0.165    | 0.211786 | 6  | 16 | 0.5  | exponential |
| <b>0.348</b> | 0.319    | 0.376    | 6  | 16 | 0.65 | exponential |
| <b>0.598</b> | 0.567    | 0.628467 | 6  | 16 | 0.8  | exponential |
| <b>0.181</b> | 0.156064 | 0.206    | 10 | 4  | 0.5  | exponential |
| <b>0.425</b> | 0.396    | 0.454    | 10 | 4  | 0.65 | exponential |
| <b>0.615</b> | 0.584    | 0.645388 | 10 | 4  | 0.8  | exponential |
| <b>0.148</b> | 0.127    | 0.169    | 10 | 8  | 0.5  | exponential |
| <b>0.352</b> | 0.323    | 0.384    | 10 | 8  | 0.65 | exponential |
| <b>0.508</b> | 0.48     | 0.541514 | 10 | 8  | 0.8  | exponential |
| <b>0.15</b>  | 0.129497 | 0.173    | 10 | 12 | 0.5  | exponential |
| <b>0.388</b> | 0.358    | 0.417    | 10 | 12 | 0.65 | exponential |
| <b>0.543</b> | 0.51     | 0.573381 | 10 | 12 | 0.8  | exponential |
| <b>0.171</b> | 0.15     | 0.197    | 10 | 16 | 0.5  | exponential |
| <b>0.418</b> | 0.389    | 0.451    | 10 | 16 | 0.65 | exponential |
| <b>0.592</b> | 0.561    | 0.623    | 10 | 16 | 0.8  | exponential |
| <b>0.212</b> | 0.18741  | 0.239    | 14 | 4  | 0.5  | exponential |
| <b>0.4</b>   | 0.37     | 0.431    | 14 | 4  | 0.65 | exponential |
| <b>0.682</b> | 0.652    | 0.709    | 14 | 4  | 0.8  | exponential |
| <b>0.18</b>  | 0.156712 | 0.202    | 14 | 8  | 0.5  | exponential |
| <b>0.326</b> | 0.297    | 0.356    | 14 | 8  | 0.65 | exponential |
| <b>0.58</b>  | 0.547    | 0.609    | 14 | 8  | 0.8  | exponential |
| <b>0.164</b> | 0.142    | 0.186    | 14 | 12 | 0.5  | exponential |
| <b>0.368</b> | 0.338    | 0.401    | 14 | 12 | 0.65 | exponential |
| <b>0.611</b> | 0.582    | 0.641    | 14 | 12 | 0.8  | exponential |
| <b>0.199</b> | 0.175    | 0.227    | 14 | 16 | 0.5  | exponential |
| <b>0.404</b> | 0.375    | 0.435    | 14 | 16 | 0.65 | exponential |
| <b>0.665</b> | 0.634    | 0.691    | 14 | 16 | 0.8  | exponential |
| <b>0.284</b> | 0.257029 | 0.311    | 20 | 4  | 0.5  | exponential |
| <b>0.587</b> | 0.557    | 0.618    | 20 | 4  | 0.65 | exponential |
| <b>0.854</b> | 0.83     | 0.874    | 20 | 4  | 0.8  | exponential |
| <b>0.199</b> | 0.175    | 0.225    | 20 | 8  | 0.5  | exponential |
| <b>0.43</b>  | 0.398    | 0.461    | 20 | 8  | 0.65 | exponential |
| <b>0.73</b>  | 0.700029 | 0.757    | 20 | 8  | 0.8  | exponential |
| <b>0.239</b> | 0.216    | 0.267    | 20 | 12 | 0.5  | exponential |

|              |          |          |    |    |      |             |
|--------------|----------|----------|----|----|------|-------------|
| <b>0.465</b> | 0.433    | 0.497311 | 20 | 12 | 0.65 | exponential |
| <b>0.783</b> | 0.756391 | 0.806    | 20 | 12 | 0.8  | exponential |
| <b>0.256</b> | 0.23009  | 0.285    | 20 | 16 | 0.5  | exponential |
| <b>0.543</b> | 0.51     | 0.574    | 20 | 16 | 0.65 | exponential |
| <b>0.839</b> | 0.816    | 0.86     | 20 | 16 | 0.8  | exponential |
| <b>0.104</b> | 0.088    | 0.126    | 1  | 4  | 0.5  | exponential |
| <b>0.24</b>  | 0.213    | 0.266    | 1  | 4  | 0.65 | exponential |
| <b>0.24</b>  | 0.215    | 0.267    | 1  | 4  | 0.8  | exponential |
| <b>0.113</b> | 0.096    | 0.132    | 1  | 8  | 0.5  | exponential |
| <b>0.225</b> | 0.201    | 0.251    | 1  | 8  | 0.65 | exponential |
| <b>0.4</b>   | 0.37     | 0.427966 | 1  | 8  | 0.8  | exponential |
| <b>0.234</b> | 0.210727 | 0.262    | 1  | 12 | 0.5  | exponential |
| <b>0.505</b> | 0.475    | 0.537734 | 1  | 12 | 0.65 | exponential |
| <b>0.716</b> | 0.686    | 0.744    | 1  | 12 | 0.8  | exponential |
| <b>0.405</b> | 0.376    | 0.435    | 1  | 16 | 0.5  | exponential |
| <b>0.643</b> | 0.613    | 0.670492 | 1  | 16 | 0.65 | exponential |
| <b>0.825</b> | 0.8      | 0.85     | 1  | 16 | 0.8  | exponential |

104

105 *Supplemental Table 4. Power of our approach for the synthetic data with the multivariate effect*  
106 *introduced over 4 time-points, specifically TRs 5, 6, 7 and 8. We report values for all trials*  
107 *numbers, subject groups, noise distributions and % of data showing the effect.*



| Power | Lower CI | Upper CI | Number of Subjects | Number of Trials | Target Effect | Noise Distribution |
|-------|----------|----------|--------------------|------------------|---------------|--------------------|
| 0.194 | 0.168    | 0.219    | 6                  | 4                | 0.5           | normal             |
| 0.366 | 0.339369 | 0.395    | 6                  | 4                | 0.65          | normal             |
| 0.615 | 0.586    | 0.643    | 6                  | 4                | 0.8           | normal             |
| 0.185 | 0.163    | 0.210865 | 6                  | 8                | 0.5           | normal             |
| 0.323 | 0.295    | 0.350254 | 6                  | 8                | 0.65          | normal             |
| 0.567 | 0.537    | 0.597583 | 6                  | 8                | 0.8           | normal             |
| 0.183 | 0.158    | 0.207    | 6                  | 12               | 0.5           | normal             |
| 0.322 | 0.29369  | 0.351    | 6                  | 12               | 0.65          | normal             |
| 0.582 | 0.551    | 0.612    | 6                  | 12               | 0.8           | normal             |
| 0.208 | 0.182    | 0.234    | 6                  | 16               | 0.5           | normal             |
| 0.341 | 0.312    | 0.371    | 6                  | 16               | 0.65          | normal             |
| 0.616 | 0.586779 | 0.645    | 6                  | 16               | 0.8           | normal             |
| 0.192 | 0.167    | 0.216446 | 10                 | 4                | 0.5           | normal             |
| 0.463 | 0.429    | 0.493158 | 10                 | 4                | 0.65          | normal             |
| 0.655 | 0.626    | 0.684    | 10                 | 4                | 0.8           | normal             |
| 0.166 | 0.143    | 0.189    | 10                 | 8                | 0.5           | normal             |
| 0.376 | 0.346    | 0.406    | 10                 | 8                | 0.65          | normal             |
| 0.558 | 0.531    | 0.587638 | 10                 | 8                | 0.8           | normal             |
| 0.183 | 0.159    | 0.207057 | 10                 | 12               | 0.5           | normal             |
| 0.441 | 0.411    | 0.470822 | 10                 | 12               | 0.65          | normal             |
| 0.61  | 0.583    | 0.64115  | 10                 | 12               | 0.8           | normal             |
| 0.171 | 0.148    | 0.195    | 10                 | 16               | 0.5           | normal             |
| 0.409 | 0.377636 | 0.439    | 10                 | 16               | 0.65          | normal             |
| 0.576 | 0.545    | 0.605    | 10                 | 16               | 0.8           | normal             |
| 0.233 | 0.205    | 0.259876 | 14                 | 4                | 0.5           | normal             |
| 0.471 | 0.442    | 0.5      | 14                 | 4                | 0.65          | normal             |
| 0.715 | 0.689    | 0.74     | 14                 | 4                | 0.8           | normal             |
| 0.195 | 0.173    | 0.222    | 14                 | 8                | 0.5           | normal             |
| 0.338 | 0.309    | 0.368    | 14                 | 8                | 0.65          | normal             |
| 0.582 | 0.549    | 0.61     | 14                 | 8                | 0.8           | normal             |
| 0.175 | 0.152    | 0.199    | 14                 | 12               | 0.5           | normal             |
| 0.358 | 0.329    | 0.389452 | 14                 | 12               | 0.65          | normal             |
| 0.633 | 0.602    | 0.66     | 14                 | 12               | 0.8           | normal             |
| 0.211 | 0.184    | 0.234939 | 14                 | 16               | 0.5           | normal             |
| 0.404 | 0.373    | 0.435816 | 14                 | 16               | 0.65          | normal             |
| 0.673 | 0.642    | 0.7      | 14                 | 16               | 0.8           | normal             |
| 0.347 | 0.32076  | 0.378    | 20                 | 4                | 0.5           | normal             |
| 0.673 | 0.644332 | 0.703    | 20                 | 4                | 0.65          | normal             |
| 0.915 | 0.896    | 0.932    | 20                 | 4                | 0.8           | normal             |
| 0.208 | 0.183    | 0.236    | 20                 | 8                | 0.5           | normal             |

|              |          |          |    |    |      |         |
|--------------|----------|----------|----|----|------|---------|
| <b>0.435</b> | 0.405    | 0.467    | 20 | 8  | 0.65 | normal  |
| <b>0.76</b>  | 0.736    | 0.786    | 20 | 8  | 0.8  | normal  |
| <b>0.248</b> | 0.224    | 0.275    | 20 | 12 | 0.5  | normal  |
| <b>0.522</b> | 0.49022  | 0.553    | 20 | 12 | 0.65 | normal  |
| <b>0.809</b> | 0.784    | 0.833    | 20 | 12 | 0.8  | normal  |
| <b>0.276</b> | 0.251    | 0.307    | 20 | 16 | 0.5  | normal  |
| <b>0.573</b> | 0.543738 | 0.603    | 20 | 16 | 0.65 | normal  |
| <b>0.848</b> | 0.825    | 0.869    | 20 | 16 | 0.8  | normal  |
| <b>0.075</b> | 0.06     | 0.093    | 1  | 4  | 0.5  | normal  |
| <b>0.27</b>  | 0.243    | 0.3      | 1  | 4  | 0.65 | normal  |
| <b>0.27</b>  | 0.243    | 0.296    | 1  | 4  | 0.8  | normal  |
| <b>0.102</b> | 0.084    | 0.122699 | 1  | 8  | 0.5  | normal  |
| <b>0.199</b> | 0.176    | 0.226    | 1  | 8  | 0.65 | normal  |
| <b>0.361</b> | 0.331    | 0.391    | 1  | 8  | 0.8  | normal  |
| <b>0.228</b> | 0.20375  | 0.255    | 1  | 12 | 0.5  | normal  |
| <b>0.497</b> | 0.465068 | 0.527    | 1  | 12 | 0.65 | normal  |
| <b>0.692</b> | 0.664    | 0.721679 | 1  | 12 | 0.8  | normal  |
| <b>0.405</b> | 0.373    | 0.438    | 1  | 16 | 0.5  | normal  |
| <b>0.617</b> | 0.586    | 0.643    | 1  | 16 | 0.65 | normal  |
| <b>0.788</b> | 0.759    | 0.813095 | 1  | 16 | 0.8  | normal  |
| <b>0.173</b> | 0.15     | 0.197167 | 6  | 4  | 0.5  | uniform |
| <b>0.327</b> | 0.298    | 0.357    | 6  | 4  | 0.65 | uniform |
| <b>0.581</b> | 0.55     | 0.61     | 6  | 4  | 0.8  | uniform |
| <b>0.168</b> | 0.147    | 0.195    | 6  | 8  | 0.5  | uniform |
| <b>0.306</b> | 0.279831 | 0.335    | 6  | 8  | 0.65 | uniform |
| <b>0.541</b> | 0.510263 | 0.570159 | 6  | 8  | 0.8  | uniform |
| <b>0.172</b> | 0.15     | 0.197383 | 6  | 12 | 0.5  | uniform |
| <b>0.324</b> | 0.294    | 0.352    | 6  | 12 | 0.65 | uniform |
| <b>0.559</b> | 0.53     | 0.593    | 6  | 12 | 0.8  | uniform |
| <b>0.192</b> | 0.169    | 0.215    | 6  | 16 | 0.5  | uniform |
| <b>0.361</b> | 0.331    | 0.393    | 6  | 16 | 0.65 | uniform |
| <b>0.587</b> | 0.557    | 0.617805 | 6  | 16 | 0.8  | uniform |
| <b>0.189</b> | 0.166155 | 0.214    | 10 | 4  | 0.5  | uniform |
| <b>0.475</b> | 0.443513 | 0.505482 | 10 | 4  | 0.65 | uniform |
| <b>0.655</b> | 0.6233   | 0.682356 | 10 | 4  | 0.8  | uniform |
| <b>0.151</b> | 0.129    | 0.172137 | 10 | 8  | 0.5  | uniform |
| <b>0.357</b> | 0.325    | 0.385727 | 10 | 8  | 0.65 | uniform |
| <b>0.52</b>  | 0.488    | 0.548    | 10 | 8  | 0.8  | uniform |
| <b>0.173</b> | 0.15     | 0.198    | 10 | 12 | 0.5  | uniform |
| <b>0.405</b> | 0.373    | 0.434    | 10 | 12 | 0.65 | uniform |
| <b>0.574</b> | 0.542121 | 0.606    | 10 | 12 | 0.8  | uniform |

|              |          |          |    |    |      |             |
|--------------|----------|----------|----|----|------|-------------|
| <b>0.174</b> | 0.151    | 0.198    | 10 | 16 | 0.5  | uniform     |
| <b>0.422</b> | 0.391    | 0.454613 | 10 | 16 | 0.65 | uniform     |
| <b>0.605</b> | 0.574636 | 0.634    | 10 | 16 | 0.8  | uniform     |
| <b>0.24</b>  | 0.217    | 0.268804 | 14 | 4  | 0.5  | uniform     |
| <b>0.443</b> | 0.411    | 0.475    | 14 | 4  | 0.65 | uniform     |
| <b>0.739</b> | 0.712745 | 0.769    | 14 | 4  | 0.8  | uniform     |
| <b>0.15</b>  | 0.13     | 0.172    | 14 | 8  | 0.5  | uniform     |
| <b>0.334</b> | 0.306    | 0.367199 | 14 | 8  | 0.65 | uniform     |
| <b>0.589</b> | 0.557053 | 0.618    | 14 | 8  | 0.8  | uniform     |
| <b>0.196</b> | 0.173    | 0.222    | 14 | 12 | 0.5  | uniform     |
| <b>0.39</b>  | 0.361    | 0.420851 | 14 | 12 | 0.65 | uniform     |
| <b>0.645</b> | 0.612924 | 0.67     | 14 | 12 | 0.8  | uniform     |
| <b>0.204</b> | 0.181    | 0.228749 | 14 | 16 | 0.5  | uniform     |
| <b>0.379</b> | 0.352    | 0.41     | 14 | 16 | 0.65 | uniform     |
| <b>0.659</b> | 0.627    | 0.686    | 14 | 16 | 0.8  | uniform     |
| <b>0.358</b> | 0.328    | 0.386872 | 20 | 4  | 0.5  | uniform     |
| <b>0.69</b>  | 0.663433 | 0.715    | 20 | 4  | 0.65 | uniform     |
| <b>0.914</b> | 0.896    | 0.93     | 20 | 4  | 0.8  | uniform     |
| <b>0.214</b> | 0.191    | 0.241    | 20 | 8  | 0.5  | uniform     |
| <b>0.451</b> | 0.42     | 0.482    | 20 | 8  | 0.65 | uniform     |
| <b>0.743</b> | 0.714    | 0.77     | 20 | 8  | 0.8  | uniform     |
| <b>0.212</b> | 0.188    | 0.236705 | 20 | 12 | 0.5  | uniform     |
| <b>0.476</b> | 0.445    | 0.506874 | 20 | 12 | 0.65 | uniform     |
| <b>0.796</b> | 0.770032 | 0.821    | 20 | 12 | 0.8  | uniform     |
| <b>0.275</b> | 0.248    | 0.305257 | 20 | 16 | 0.5  | uniform     |
| <b>0.555</b> | 0.525    | 0.585909 | 20 | 16 | 0.65 | uniform     |
| <b>0.848</b> | 0.826    | 0.87     | 20 | 16 | 0.8  | uniform     |
| <b>0.072</b> | 0.058    | 0.09     | 1  | 4  | 0.5  | uniform     |
| <b>0.221</b> | 0.192    | 0.244    | 1  | 4  | 0.65 | uniform     |
| <b>0.221</b> | 0.195854 | 0.247    | 1  | 4  | 0.8  | uniform     |
| <b>0.108</b> | 0.089    | 0.127    | 1  | 8  | 0.5  | uniform     |
| <b>0.208</b> | 0.184    | 0.234    | 1  | 8  | 0.65 | uniform     |
| <b>0.364</b> | 0.334    | 0.395    | 1  | 8  | 0.8  | uniform     |
| <b>0.231</b> | 0.205    | 0.259    | 1  | 12 | 0.5  | uniform     |
| <b>0.5</b>   | 0.468    | 0.53     | 1  | 12 | 0.65 | uniform     |
| <b>0.698</b> | 0.670271 | 0.725792 | 1  | 12 | 0.8  | uniform     |
| <b>0.402</b> | 0.37     | 0.431873 | 1  | 16 | 0.5  | uniform     |
| <b>0.618</b> | 0.587    | 0.6474   | 1  | 16 | 0.65 | uniform     |
| <b>0.788</b> | 0.762    | 0.813    | 1  | 16 | 0.8  | uniform     |
| <b>0.194</b> | 0.170766 | 0.218    | 6  | 4  | 0.5  | exponential |
| <b>0.337</b> | 0.31     | 0.368    | 6  | 4  | 0.65 | exponential |

|              |          |          |    |    |      |             |
|--------------|----------|----------|----|----|------|-------------|
| <b>0.605</b> | 0.574024 | 0.636    | 6  | 4  | 0.8  | exponential |
| <b>0.191</b> | 0.167503 | 0.218    | 6  | 8  | 0.5  | exponential |
| <b>0.314</b> | 0.288    | 0.347198 | 6  | 8  | 0.65 | exponential |
| <b>0.568</b> | 0.539    | 0.6      | 6  | 8  | 0.8  | exponential |
| <b>0.169</b> | 0.147    | 0.194116 | 6  | 12 | 0.5  | exponential |
| <b>0.313</b> | 0.285    | 0.342426 | 6  | 12 | 0.65 | exponential |
| <b>0.556</b> | 0.523    | 0.58403  | 6  | 12 | 0.8  | exponential |
| <b>0.171</b> | 0.15     | 0.198    | 6  | 16 | 0.5  | exponential |
| <b>0.336</b> | 0.309    | 0.364    | 6  | 16 | 0.65 | exponential |
| <b>0.576</b> | 0.543    | 0.606    | 6  | 16 | 0.8  | exponential |
| <b>0.186</b> | 0.164    | 0.213    | 10 | 4  | 0.5  | exponential |
| <b>0.467</b> | 0.436748 | 0.497    | 10 | 4  | 0.65 | exponential |
| <b>0.651</b> | 0.622    | 0.683    | 10 | 4  | 0.8  | exponential |
| <b>0.143</b> | 0.123    | 0.166553 | 10 | 8  | 0.5  | exponential |
| <b>0.348</b> | 0.316168 | 0.377    | 10 | 8  | 0.65 | exponential |
| <b>0.516</b> | 0.484718 | 0.546    | 10 | 8  | 0.8  | exponential |
| <b>0.162</b> | 0.141    | 0.188141 | 10 | 12 | 0.5  | exponential |
| <b>0.387</b> | 0.357    | 0.418    | 10 | 12 | 0.65 | exponential |
| <b>0.577</b> | 0.546    | 0.609    | 10 | 12 | 0.8  | exponential |
| <b>0.185</b> | 0.16     | 0.212    | 10 | 16 | 0.5  | exponential |
| <b>0.417</b> | 0.389    | 0.448198 | 10 | 16 | 0.65 | exponential |
| <b>0.603</b> | 0.573    | 0.633    | 10 | 16 | 0.8  | exponential |
| <b>0.249</b> | 0.225    | 0.277    | 14 | 4  | 0.5  | exponential |
| <b>0.504</b> | 0.471    | 0.535    | 14 | 4  | 0.65 | exponential |
| <b>0.78</b>  | 0.753781 | 0.807    | 14 | 4  | 0.8  | exponential |
| <b>0.169</b> | 0.147    | 0.192    | 14 | 8  | 0.5  | exponential |
| <b>0.347</b> | 0.32     | 0.377    | 14 | 8  | 0.65 | exponential |
| <b>0.601</b> | 0.569    | 0.63     | 14 | 8  | 0.8  | exponential |
| <b>0.187</b> | 0.163    | 0.212768 | 14 | 12 | 0.5  | exponential |
| <b>0.37</b>  | 0.340551 | 0.401    | 14 | 12 | 0.65 | exponential |
| <b>0.629</b> | 0.598    | 0.661    | 14 | 12 | 0.8  | exponential |
| <b>0.188</b> | 0.164    | 0.212    | 14 | 16 | 0.5  | exponential |
| <b>0.408</b> | 0.376942 | 0.439    | 14 | 16 | 0.65 | exponential |
| <b>0.696</b> | 0.668523 | 0.724    | 14 | 16 | 0.8  | exponential |
| <b>0.369</b> | 0.341    | 0.402    | 20 | 4  | 0.5  | exponential |
| <b>0.674</b> | 0.646    | 0.703049 | 20 | 4  | 0.65 | exponential |
| <b>0.903</b> | 0.882    | 0.92     | 20 | 4  | 0.8  | exponential |
| <b>0.205</b> | 0.181    | 0.235    | 20 | 8  | 0.5  | exponential |
| <b>0.45</b>  | 0.418655 | 0.482161 | 20 | 8  | 0.65 | exponential |
| <b>0.761</b> | 0.729    | 0.785    | 20 | 8  | 0.8  | exponential |
| <b>0.225</b> | 0.199625 | 0.251    | 20 | 12 | 0.5  | exponential |

|              |          |          |    |    |      |             |
|--------------|----------|----------|----|----|------|-------------|
| <b>0.49</b>  | 0.458988 | 0.52     | 20 | 12 | 0.65 | exponential |
| <b>0.808</b> | 0.784    | 0.833    | 20 | 12 | 0.8  | exponential |
| <b>0.272</b> | 0.246    | 0.299    | 20 | 16 | 0.5  | exponential |
| <b>0.578</b> | 0.545    | 0.607    | 20 | 16 | 0.65 | exponential |
| <b>0.838</b> | 0.814    | 0.861092 | 20 | 16 | 0.8  | exponential |
| <b>0.091</b> | 0.074    | 0.109    | 1  | 4  | 0.5  | exponential |
| <b>0.248</b> | 0.221    | 0.275    | 1  | 4  | 0.65 | exponential |
| <b>0.248</b> | 0.220532 | 0.274    | 1  | 4  | 0.8  | exponential |
| <b>0.101</b> | 0.084    | 0.121    | 1  | 8  | 0.5  | exponential |
| <b>0.208</b> | 0.182    | 0.234    | 1  | 8  | 0.65 | exponential |
| <b>0.394</b> | 0.362    | 0.423    | 1  | 8  | 0.8  | exponential |
| <b>0.24</b>  | 0.214    | 0.26624  | 1  | 12 | 0.5  | exponential |
| <b>0.491</b> | 0.459    | 0.522368 | 1  | 12 | 0.65 | exponential |
| <b>0.684</b> | 0.657704 | 0.713    | 1  | 12 | 0.8  | exponential |
| <b>0.429</b> | 0.397    | 0.461    | 1  | 16 | 0.5  | exponential |
| <b>0.635</b> | 0.605    | 0.663    | 1  | 16 | 0.65 | exponential |
| <b>0.815</b> | 0.788    | 0.839    | 1  | 16 | 0.8  | exponential |

108

109 *Supplemental Table 5. Power of our approach for the synthetic data with the multivariate effect*  
110 *introduced over 5 time-points, specifically TRs 5, 6, 7, 8 and 9. We report values for all trials*  
111 *numbers, subject groups, noise distributions and % of data showing the effect.*

112
